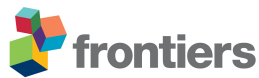

# Heritability of the structures and $^{13}\text{C}$ fractionation in tomato leaf wax alkanes: a genetic model system to inform paleoenvironmental reconstructions

1 **Amanda L.D. Bender<sup>1\*</sup>, Daniel H. Chitwood<sup>2,3</sup>, Alexander S. Bradley<sup>1</sup>**

2 <sup>1</sup>Department of Earth and Planetary Sciences, Washington University in St. Louis, St. Louis, MO,  
3 USA

4 <sup>2</sup>Donald Danforth Plant Science Center, St. Louis, MO, USA

5 <sup>3</sup>Current address: Independent Researcher, St. Louis, MO, USA

6 \* **Correspondence:** Amanda L.D. Bender, [bender@levee.wustl.edu](mailto:bender@levee.wustl.edu), Department of Earth and  
7 Planetary Sciences, Washington University in St. Louis, 1 Brookings Drive, St. Louis, MO, 63130,  
8 USA

9 **Keywords:** *n*-alkanes, *iso*-alkanes, *anteiso*-alkanes, tomato, introgression line, QTLs, stable carbon  
10 isotopes

## 11 **Abstract**

12 Leaf wax *n*-alkanes are broadly used to reconstruct paleoenvironmental information. However, the  
13 utility of the *n*-alkane paleoclimate proxy is modulated by the extent to which genetic as well as  
14 environmental factors influence the structural and isotopic variability of leaf waxes. In paleoclimate  
15 applications, there is an implicit assumption that most variation of leaf wax traits through a time  
16 series can be attributed to environmental change and that biological sources of variability within  
17 plant communities are small. For example, changes in hydrology affect the  $\delta^2\text{H}$  of waxes through  
18 rainwater and the  $\delta^{13}\text{C}$  of leaf waxes by changing plant communities (i.e.,  $\text{C}_3$  versus  $\text{C}_4$  input). Here  
19 we test the assumption of little genetic control over  $\delta^{13}\text{C}$  variation of leaf wax by presenting the  
20 results of an experimental greenhouse growth study in which we estimate the role of genetic  
21 variability on structural and isotopic leaf wax traits in a set of 76 introgression lines (ILs) between  
22 two interfertile *Solanum* (tomato) species: *S. lycopersicum* cv M82 (hereafter cv M82) and *S.*  
23 *pennellii*. We found that the leaves of *S. pennellii*, a wild desert tomato relative, produces  
24 significantly more *iso*-alkanes than cv M82, a domesticated tomato cultivar adapted to water-replete  
25 conditions; we introduce a methylation index to summarize the ratio of branched (*iso*- and *anteiso*-)  
26 to total alkanes. Between *S. pennellii* and cv M82, the *iso*-alkanes were found to be enriched in  $^{13}\text{C}$   
27 by 1.2–1.4‰ over *n*-alkanes. By modeling our results from the ILs, we report the broad-sense  
28 heritability values ( $H^2$ ) of leaf wax traits to describe the degree to which genetic variation contributes  
29 to variation of these traits. Individual carbon isotope values of alkanes are of low heritability ( $H^2 =$   
30 0.13–0.19), suggesting that  $\delta^{13}\text{C}$  of leaf waxes from this study are strongly influenced by  
31 environmental variance, which supports the interpretation that variation in the  $\delta^{13}\text{C}$  of wax  
32 compounds recorded in sediments reflects paleohydrological changes. Average chain length (ACL)  
33 values of *n*-alkanes are of intermediate heritability ( $H^2 = 0.30$ ), suggesting that ACL values are  
34 strongly influenced by genetic cues.

## 35 1 Introduction

36 Long chain ( $C_{21} - C_{39}$ ) *n*-alkanes are characteristic components of the cuticular waxes of terrestrial  
37 plants (Jetter et al., 2006). Alkanes are geologically stable, and their structures and isotopic  
38 compositions carry biological and environmental information. In a geological context, this  
39 information can be used for paleoenvironmental and paleoecological reconstructions. Structural traits  
40 in *n*-alkanes, such as average chain length (ACL), may relate to climatic variables such as  
41 temperature and humidity, as well as to the plant sources of the *n*-alkanes (Bush and McInerney,  
42 2013, 2015). Stable isotopes of carbon ( $\delta^{13}C$ ) in plant materials, including waxes, relate to the plant's  
43 carbon fixation pathway (Naafs et al., 2012; Tipple and Pagani, 2010), to physiological parameters of  
44 plants such as water use efficiency (WUE) and stomatal conductance (Easlon et al., 2014), and to  
45 environmental parameters such as atmospheric  $CO_2$  concentration (Schubert and Jahren, 2012).  
46 Hydrogen ratios ( $\delta^2H$ ) in plant wax *n*-alkanes relate to the  $\delta^2H$  of rainwater, as well as to a number of  
47 environmental and physiological parameters (Sachse et al., 2012).

48 Although these characteristics are informative, the utility of *n*-alkanes in tracing environmental  
49 variability is moderated by uncertainty about the degree to which structural and isotopic variability is  
50 a function of plant biology in addition to environmental conditions. Therefore, the efficacy of  
51 sedimentary *n*-alkanes in paleoclimate applications can be informed by a better understanding of  
52 plant biology, and of the genetic and physiological factors that control structural and isotopic  
53 variations in plant wax compounds.

54 One approach to understanding the role of biological variability consists of sampling leaf wax  
55 material from a range of species in a terrestrial environment. For example, Hou et al. (2007a) showed  
56 that  $\delta^2H$  values co-vary with  $\delta^{13}C$  values of leaf waxes and may be related to WUE in a range of tree  
57 species sampled in a single environment near Blood Pond, Massachusetts (Hou et al., 2007a). Leaf  
58 wax  $\delta^2H$  values of different plant types from the same environment have been shown to vary by as  
59 much as 70‰ (Hou et al., 2007b), and interspecies variations with a standard deviation of 21‰ were  
60 observed in the hydrogen isotopic composition of plant-derived *n*-alkanes in an arid ecosystem  
61 (Feakins and Sessions, 2010). Total *n*-alkane abundances vary greatly among angiosperms; for  
62 example, total *n*-alkane abundances in different species of the same plant family (Betulaceae) range  
63 from <50  $\mu g/g$  dry leaf to 1300  $\mu g/g$  dry leaf (Diefendorf et al., 2011). Carbon isotope values of *n*-  
64 alkanes measured from a wide range of angiosperms have been reported to vary by up to ~10‰  
65 (Diefendorf et al., 2011). These examples demonstrate that biological variability is present among  
66 various lineages. In some cases this is strongly expressed. For example, differences in photosynthetic  
67 pathways impart a strong carbon isotopic discrimination in *n*-alkanes. Across 10 studies, *n*- $C_{29}$  and *n*-  
68  $C_{31}$  alkanes from C3 plants showed mean  $\delta^{13}C$  values of -34.0‰ and -34.3‰ with  $1\sigma$  variation of  
69 3.3‰ and 3.0‰, respectively, whereas the same alkanes from C4 plants have mean  $\delta^{13}C$  values of -  
70 21.4‰ and -21.7‰ and  $1\sigma$  variations of 2.3‰ and 2.3‰ in C4 plants (Figure 1; Supplementary  
71 Dataset 1). Within families within the broader class of C3 plants, biological variability might be  
72 expected to have an effect on  $\delta^{13}C$  values of alkanes. This could in principle be true of variability  
73 even within a single plant genus.

74 Studies of biological variability of *n*-alkane traits provide an estimate for the magnitude of potential  
75 variation but do not provide information regarding the mechanistic processes underlying that  
76 variation. An enhanced understanding of the mechanisms responsible for isotopic variability of *n*-  
77 alkanes could allow for more precise reconstructions of precipitation and/or temperature. Mechanistic  
78 questions might be addressed by studies that examine the variation of leaf wax traits with respect to

## Leaf wax genetics in *Solanum*

79 physiology (e.g., Gao et al., 2015; Smith and Freeman, 2006; Tipple et al., 2012) or genetics (e.g.,  
80 Gao et al., 2014).

81 Genetic approaches are particularly relevant for honing the understanding of leaf wax trait variability.  
82 Continuous phenotypic traits, such as the isotopic composition of *n*-alkanes, can be parameterized as  
83 reflecting a combination of genotypic factors that interact with the environment. Although this  
84 interaction is commonly recognized in biological studies, the genotype-environment interaction is  
85 consistently neglected in paleoenvironmental applications. In paleoenvironmental reconstructions  
86 that employ hydrogen isotopes of leaf wax compounds, isotopic variation is implicitly assumed to be  
87 mostly or entirely a function of environmental variability. Similarly, variation in the carbon isotopic  
88 composition of leaf waxes is usually attributed to differing inputs of C<sub>3</sub> and C<sub>4</sub> plants (Castañeda et  
89 al., 2009a, 2009b; Eglinton et al., 2002; Feakins et al., 2005, 2007; Tipple and Pagani, 2010). For  
90 individual plant species, however, there is also a strong correlation between the <sup>13</sup>C content of leaf  
91 waxes and mean annual precipitation (Diefendorf et al., 2010). The degree to which genetic variation  
92 among and within species contributes to isotopic variation is not well constrained.

93 This variation can be described using the broad-sense heritability of a trait, a widely used statistic in  
94 quantitative genetic studies. Broad-sense heritability ( $H^2$ ) is defined as the proportion of total  
95 phenotypic variance that can be attributed to genetic variation (Futuyma, 1998), as given by the  
96 equation:

$$97 \quad H^2 = \frac{V_G}{V_G + V_E} \quad (1)$$

98 where  $V_G$  is genetic variance and  $V_E$  is environmental variance. The use of phenotypic traits such as  
99 wax  $\delta^{13}\text{C}$  or  $\delta\text{D}$  values in paleoenvironmental reconstruction implicitly makes one of two  
100 assumptions: i) that variation through a time series can be attributed to environmental change, and  
101 that biological sources of variability are small, or ii) that differences in e.g.  $\delta^{13}\text{C}$  can be modeled as  
102 simple mixing between two end members (such as C<sub>3</sub> and C<sub>4</sub> plants). In this study we assess the  
103 validity of the first assumption.

104 We directly assess the broad-sense heritability of structural and isotopic leaf wax traits in a  
105 greenhouse using a model species complex consisting of precisely defined near-isogenic  
106 introgression lines (ILs; Eshed and Zamir, 1995) between two interfertile *Solanum* (tomato) species.  
107 Each of the 76 ILs possess a single introgressed genomic segment from the desert wild tomato  
108 relative *Solanum pennellii* in a domesticated tomato *Solanum lycopersicum* cv M82 background  
109 (hereafter, cv M82). Together, the introgression segments of the 76 ILs span the entire domesticated  
110 tomato genome. These two species are adapted to regions with vastly different hydrological settings.  
111 Endemic to the dry slopes of the Central Peruvian Andes (Warnock, 1991), *S. pennellii* bears smaller  
112 fruit and leaves that are smaller and less complex than those of cv M82, which was selected during  
113 cultivation in water-replete conditions (Chitwood et al., 2013). The leaves of these two species also  
114 vary in their wax content; epicuticular lipids comprised 0.96% and 19.9% of total leaf dry weight in  
115 17-week old leaves from cv M82 and *S. pennellii*, respectively (Fobes et al., 1985). The genome of *S.*  
116 *pennellii* has been well studied and sequenced (Bolger et al., 2014), which improves the utility of this  
117 model organism for genetic study.

118 Although these species are not abundant producers of leaf waxes in terrestrial ecosystems, they  
119 nonetheless provide a useful tool for investigating plant genetics and physiology. These can be  
120 considered model organisms in the same way that *Escherichia coli* is used as a model organism for

## Leaf wax genetics in *Solanum*

121 understanding fundamentals of bacterial physiology and genetics. We use this model species  
122 complex to determine the role of heritability in the production of plant wax traits that are central to  
123 paleoclimatic reconstruction. This approach allows us to test the implicit assumption that genetic  
124 variance plays a limited role in driving variation of leaf wax traits that are preserved in sediments  
125 through time, and whether the recorded variation may reflect a high-fidelity paleoclimate signal.

126 In this study, we use the *Solanum pennellii* ILs to resolve genetic and environmental effects on leaf  
127 wax  $\delta^{13}\text{C}$  values and structural traits. *n*-Alkanes are among the most abundant and simplest of waxes  
128 to extract and isolate, and are thus commonly analyzed from sediments and modern plants. Among  
129 tomatoes and other plants in the *Solanum* genus, the most abundant alkanes are *n*-alkanes, but  
130 branched *iso*- and *anteiso*-alkanes have also been identified within the *Solanum* genus (Girard et al.,  
131 2012; Silva et al., 2012; Smirnova et al., 2013; Smith et al., 1996; Szafranek and Synak, 2006). Other  
132 plants of the Solanaceae family (Grice et al., 2008; Heemann et al., 1983; Rogge and Hildemann,  
133 1994) also contain branched alkanes, as well as members of the Lamiaceae family (Huang et al.,  
134 2011; Reddy et al., 2000), *Aeonium* genus (Eglinton et al., 1962), and an Arctic chickweed (Pautler  
135 et al., 2014). Long chain *iso*- and *anteiso*- alkanes are expected to derive from the same biosynthetic  
136 pathway as *n*-alkanes, albeit with different biosynthetic precursors that might contribute to  
137 systematically distinctive  $\delta^{13}\text{C}$  values for these alkane types (Grice et al., 2008).

138 Although leaf wax traits have been shown to adapt dynamically to environmental stresses (Grice et  
139 al., 2008; Kosma et al., 2009), here we establish the static features of leaf wax traits of *S. pennellii*,  
140 cv M82, and the *S. pennellii* IL population by growing all plants in the same greenhouse conditions.  
141 We identify quantitative trait loci (QTLs) that underlie many leaf wax traits and calculate broad-  
142 sense heritability values to estimate the proportion of phenotypic variance attributable to genetic  
143 variance. Our results have important implications for uncovering the degree to which we can expect  
144 environmental versus genetic factors to modulate variability in leaf wax traits.

## 145 **2 Materials and methods**

### 146 **2.1 Plant materials, growth conditions, and experimental design**

147 We obtained second-generation *Solanum pennellii* ILs (Eshed and Zamir, 1995), *Solanum pennellii*,  
148 and *Solanum lycopersicum* cv M82 seeds from the Tomato Genetics Resource Center and the lab of  
149 Neelima Sinha (University of California, Davis) and Dani Zamir (Hebrew University, Rehovot,  
150 Israel). All seeds were prepared and germinated at the Donald Danforth Plant Science Center in St.  
151 Louis, MO as described in Chitwood et al. (2013).

#### 152 **2.1.1 Growth conditions for cv M82 and *S. pennellii***

153 In order to characterize the variance of leaf wax traits between the two parent lines, we grew ten  
154 replicates of each parent species in the greenhouse from November 2013 – January 2014. The seeds  
155 were germinated in late November 2013. Seedlings were transplanted into 2-gallon planters in the  
156 greenhouse and staggered along a greenhouse bench. Seedlings were vigorously top watered after  
157 transplanting and further watered and fertilized to ensure plant growth; irrigation water was supplied  
158 from a tap water reservoir.

159 Anthesis began in late December 2013; leaves were collected from each plant in early January 2014.  
160 One leaf was collected from each plant for leaf wax extraction and analysis based on specific criteria:  
161 (i) the leaf was fully developed (i.e., leaflets were fully unfurled), and (ii) the leaf was young (i.e.,

## Leaf wax genetics in *Solanum*

162 close to the top of the plant, arising after the reproductive transition). Each sample comprised the five  
163 primary leaflets of each leaf (terminal, distal, and proximal lateral left and right).

### 164 2.1.2 Growth conditions for ILs and cv M82

165 We grew the 76 ILs from December 2013 – February 2014. Seeds were germinated in December and  
166 transplanted to 3-gallon planters in the greenhouse in January. The ILs and cv M82 were arranged in  
167 a randomized block design with four replicates (Supplemental Figure 1, Supplemental Dataset 2).  
168 Watering and fertilization proceeded as with the parent lines.

169 After anthesis in early February, we collected leaf samples in late February according to identical  
170 criteria as with the parent lines, collecting leaves that were 6-8" in length. Our growing efforts were  
171 successful for all but four ILs (ILs 2.2, 5.3, 7.1, and 8.2).

172 During the growth period for the ILs, we monitored ambient conditions of the greenhouse: relative  
173 humidity, temperature,  $p\text{CO}_2$ , and  $\delta^{13}\text{C}_{\text{CO}_2}$ . Daytime temperature and relative humidity were  
174 monitored with custom systems integrated with the greenhouse (Argus Control Systems, Ltd.).  
175 Temperatures were maintained at approximately 78°F (25.6°C). We set up a Picarro Cavity Ring-  
176 Down Spectrometer G2131-*i* Analyzer in the greenhouse to monitor  $p\text{CO}_2$  and  $\delta^{13}\text{C}_{\text{CO}_2}$ ; these data  
177 were aggregated from 5-minute interval measurements (Supplemental Figure 2, Supplemental  
178 Dataset 3).

### 179 2.2 Leaf harvest and lipid extraction

180 Each sample consisted of five leaflets (terminal, distal lateral left and right, proximal lateral left and  
181 right) from a single leaf of each plant. We measured leaf area from all sample leaflets with a flatbed  
182 scanner and ImageJ software (Abràmoff et al., 2004). The collected leaf samples were cut into 1 cm<sup>2</sup>  
183 pieces, placed into pre-baked 15 mL clear borosilicate vials (Qorpak), and then dried in a 70°C oven  
184 for 48 hours. We extracted epicuticular waxes from the dried leaf samples by adding 5 mL of hexane  
185 (Omni-Solv HR-GC Hexanes 98.5%, VWR International, LLC) and agitating via pumping with a  
186 Pasteur pipette. The resulting total lipid extract (TLE) was collected into a separate 15 mL  
187 borosilicate vial; the extraction step was repeated three times, and the three extractions were pooled.  
188 We evaporated the TLE to dryness with heat (30°C) under a steady stream of nitrogen gas (FlexiVap  
189 Work Station, Glas-Col).

190 To isolate *n*-alkanes for analysis, we performed silica gel column chromatography on the dried TLE  
191 of each sample. We transferred the TLE with 50 µL of hexane to a silica gel column (5 cm x 4 mm  
192 Pasteur pipette packed at the base of the taper with a small amount of laboratory grade glass wool  
193 that had been previously baked at 550°C for 8 hours, a thin layer of chromatography grade sand [50-  
194 70 mesh particle size, baked at 850°C for 8 hours], and filled 3-4 cm high with H<sub>2</sub>O-deactivated  
195 silica gel [230-400 mesh particle size, baked at 550°C for 8 hours]). We collected the *n*-alkane  
196 fraction by eluting with hexane. The polar compounds retained on the silica gel column were eluted  
197 with ethyl acetate and archived.

### 198 2.3 Leaf wax structural analysis

199 We analyzed the *n*-alkane fractions using an Agilent 7890A Gas Chromatograph (GC) equipped with  
200 a 5975C Series Mass Spectrometric Detector (MSD) system at the Biogeochemistry Laboratory at  
201 Washington University in St. Louis. The GC was equipped with an Agilent J&W HP-5ms column  
202 (30 m long, 0.25 mm inner diameter, 0.25 µm film thickness). The GC-MSD system was equipped

## Leaf wax genetics in *Solanum*

203 with an Agilent 7650A Automatic Liquid Sampler. The GC oven had an initial temperature of 60°C  
204 and was heated at a rate of 6°C/min to the final temperature of 320°C, which was held for 20  
205 minutes. One sample run lasted approximately 65 minutes. *n*-Alkanes were identified by their mass  
206 spectra and quantified against an internal standard (n-hexadecane-d<sub>34</sub>, 98 atom%, Sigma-Aldrich).

### 207 2.4 Carbon isotope analysis

208 Carbon isotopic compositions of *n*-alkanes were determined on a gas chromatograph coupled via a  
209 combustion reactor to a Thermo-Finnigan Delta Plus mass spectrometer at the Biogeochemistry  
210 Laboratory at Washington University in St. Louis. δ<sup>13</sup>C values were measured against an internal *n*-  
211 alkane standard (C<sub>18</sub>) and reported in ‰ against the standard Vienna Pee Dee Belemnite (V-PDB).  
212 All samples were analyzed in triplicate. An *n*-alkane standard (B3 or A5) of 15 externally calibrated  
213 *n*-alkanes and a fatty acid standard (F8) of 8 externally calibrated fatty acids provided by A.  
214 Schimmelmann (Indiana University) were measured between every fifth sample injection. Analytical  
215 uncertainty of reported δ<sup>13</sup>C values ranges between ± 0.2‰ and 0.3‰ (SEM), dependent on the  
216 number of analytical replicates, after propagating the uncertainty of replicate analyses and external  
217 molecular standards (Polissar and D'Andrea, 2014) (data available on GitHub repository at  
218 <http://github.com/aldbender/13C-heritability>).

219 Ambient greenhouse CO<sub>2</sub> was monitored during growth of the *Solanum* ILs from December 19, 2013  
220 – February 24, 2014, except for the period from January 1-14 when a technical error prevented data  
221 collection. For the ILs and cv M82 plants grown simultaneously in the greenhouse, we report the  
222 apparent fractionation (<sup>13</sup>ε) between the carbon isotope value of atmospheric CO<sub>2</sub> (δ<sup>13</sup>C<sub>atm</sub>) and the  
223 carbon isotope of the lipid (δ<sup>13</sup>C<sub>lipid</sub>):

$$224 \quad {}^{13}\epsilon = \frac{1000 + \delta^{13}\text{C}_{\text{lipid}}}{1000 + \delta^{13}\text{C}_{\text{atm}}} - 1. \quad (2)$$

225 Carbon isotope values of lipids from *S. pennellii* and cv M82 grown during November 2013 are not  
226 reported as Δ values because the carbon isotopic value of ambient greenhouse CO<sub>2</sub> was not recorded  
227 during their growth period. We also report the differences in δ<sup>13</sup>C (‰) between *n*-alkanes and *iso*-  
228 alkanes of the same carbon-numbered alkanes, expressed as δ<sub>*n*-alkanes</sub> – δ<sub>*iso*-alkanes</sub> (or simply δ<sub>*n*</sub> – δ<sub>*iso*</sub>).

### 229 2.5 Characterizing *n*-alkane distributions

230 We characterized the distribution of alkanes for each sample by calculating a suite of summary traits:  
231 the methylation index (a novel measure of this study), and average chain length (ACL) and carbon  
232 preference index (CPI) each calculated individually for *n*-, *iso*-, and *anteiso*-alkanes. Here, we define  
233 the methylation index as the relative abundance of branched (*iso*- and *anteiso*-) alkanes to the total of  
234 branched and unbranched (*normal*) alkanes as in the equation:

$$235 \quad \text{Methylation index} = \frac{\sum(\text{iso}C_{i+1} + \text{anteiso}C_{i+1})}{\sum(\text{n}C_i + \text{iso}C_{i+1} + \text{anteiso}C_{i+1})}, \quad (3)$$

236 where *iso*C<sub>*i*+1</sub>, *anteiso*C<sub>*i*+1</sub>, and *n*C<sub>*i*</sub> are the concentrations of *iso*-, *anteiso*-, and *n*- alkanes with *i*  
237 carbon chain length, respectively. A methylation index value of 0 indicates that there are only *n*-  
238 alkanes in a sample, whereas a methylation index value of 1 indicates that there are only *iso*- and  
239 *anteiso*-alkanes in a sample. The average chain length (ACL) is the weighted average of the carbon  
240 chain lengths, defined as:

## Leaf wax genetics in *Solanum*

241 
$$ACL = \frac{\sum(C_n \cdot n)}{\sum C_n}, (4)$$

242 where  $C_n$  is the concentration of each alkane with  $n$  carbon atoms. The carbon preference index (CPI)  
243 measures the relative abundance of odd over even carbon chain lengths, where:

244 
$$CPI = \frac{\sum_{odd}(C_{27-31}) + \sum_{odd}(C_{29-33})}{2 \cdot \sum_{even}(C_{28-32})}, (5)$$

245 and summarizes the dominance of odd carbon number alkanes over even carbon number alkanes.  
246 Greater CPI values indicate a greater predominance of odd over even chain lengths.

### 247 **2.6 Statistical modeling and QTL analysis**

248 Data from all traits measured from the ILs are reported in Supplemental Dataset 3. The R code and  
249 data sets used for modeling are available on GitHub at <http://github.com/aldbender/13C-heritability>.  
250 Leaf wax traits were modeled using mixed-effect linear models with the lme4 packages  
251 (<http://CRAN.R-project.org/package=lme4>) in R (R Development Core Team, 2015). Before  
252 modeling, we compared the measured values against theoretical normally distributed values in a Q-Q  
253 plot to check whether the measured values came from a normally distributed population. If a trait  
254 deviated from a normal distribution, we transformed the trait by either taking the square root, log,  
255 reciprocal, or arcsine of the trait and tested for normality of each transformed population via the  
256 Shapiro-Wilk test, using the transformation that resulted in the least deviation from a normal  
257 distribution (see Supplemental Dataset 4 for measured trait summaries and the selected  
258 transformation for each trait). In order to perform linear modeling, all  $\delta_n - \delta_{iso}$  values were  
259 additionally transformed by calculating the absolute value. After performing the mixed-effect linear  
260 modeling, the normal distribution of residuals in the model was verified. We extracted  $p$ -values for  
261 significant ( $p < 0.05$ ) differences between ILs and cv M82 from the models using the pvals.fnc  
262 function from the language R package (<http://CRAN.R-project.org/package=languageR>); these  $p$ -  
263 values were used to generate the QTL analysis. We calculated the broad sense heritability values ( $H^2$ )  
264 from the estimates of genetic and environmental and residual variances from the mixed-effect linear  
265 modeling (see Supplemental Dataset 5), as defined in Equation 1.

### 266 **2.7 Hierarchical clustering of traits**

267 Hierarchical clustering is used to build a hierarchy of traits that cluster together based on  
268 dissimilarities between sets of trait observations. We performed a correlation analysis of leaf wax  
269 traits from this study with traits existing in the phenomics database (Phenom-Networks,  
270 [www.phenome-networks.com](http://www.phenome-networks.com)). For each trait in a data set, data were z-score normalized in order to  
271 transform all data ranges to a standardized average and standard deviation. Z-scores were averaged  
272 across replicates. We performed hierarchical clustering using the hclust function from the stats  
273 package in R (R Development Core Team, 2015), clustering by the absolute value of the Pearson  
274 correlation coefficient using Ward's minimum variance method. We created a correlation matrix  
275 (Spearman) between all traits measured in this study (modeled as described above) and traits from  
276 other published studies, as described below. Significance values for correlations were determined and  
277 the false discovery rate controlled via the Benjamini and Hochberg method (Benjamini and  
278 Hochberg, 1995).

279 All traits analyzed for hierarchical clustering are divided into five major groups, as determined by the  
280 studies from which they are reported and by the phenotype that they measure, following the naming

## Leaf wax genetics in *Solanum*

281 system described by Chitwood et al. (2013). “DEV” refer to leaf morphological and developmental  
282 traits as reported by Chitwood et al. (2013). “MET” traits report metabolite levels in the fruit  
283 pericarp, as measured by Schauer et al. (2006; 2008). Traits labeled “MOR” as recorded in Schauer et  
284 al. [2006; 2008] and Phenom-Networks include traits relevant to yield and morphological measures  
285 of fruits and flowers. The “ENZ” traits measure enzymatic activities in the fruit pericarp, as reported  
286 by Steinhäuser et al. (2011), and “SEED” traits measure metabolite levels in seeds, as derived from  
287 Toubiana et al. (2012). Traits described in the present study are termed “WAX” because they relate  
288 to leaf waxes.

### 289 **3 Results**

#### 290 **3.1 Leaf wax traits from *S. pennellii* and *S. lycopersicum* cv M82 plants**

291 Odd-carbon-numbered *n*-alkanes in *S. pennellii* and cv M82 ranged from C<sub>27</sub> to C<sub>35</sub>, with C<sub>31</sub> being  
292 the most abundant, followed by C<sub>33</sub> (Table 1; Figure 2). Branched alkanes with methyl groups at the  
293 *iso* and *anteiso* positions are present in measurable quantities among both *S. pennellii* and cv M82.

##### 294 **3.1.1 Alkane methylation**

295 The *S. pennellii* leaves produced more branched alkanes with methyl groups at the *iso* (second)  
296 position (Figure 2A). The average methylation index values are 0.15 and 0.50 for *S. lycopersicum* cv  
297 M82 and *S. pennellii*, respectively (Table 1), indicating that *S. pennellii* has a greater proportion of  
298 branched:normal alkanes than cv M82. This difference is driven by the higher percentage of *iso*-  
299 alkanes in *S. pennellii* (43.6% versus 8.8% in cv M82). The percent of *anteiso*-alkanes is  
300 indistinguishable between the two species.

##### 301 **3.1.2 Structural traits**

302 The *n*-alkane distributions for cv M82 and *S. pennellii* have high CPI (10.4 and 11.2, respectively;  
303 Table 1) and identical ACL (31.5) values. The *anteiso*- (3-methyl) alkanes CPI values of 0.0 for both  
304 cv M82 and *S. pennellii*, and a predominant even-numbered alkane distribution (ACL = 32.1 – 32.2).  
305 The *iso* (2-methyl) alkanes have high CPI values (10.2 and 19.4 for cv M82 and *S. pennellii*,  
306 respectively) and identical ACL values (31.8).

##### 307 **3.1.3 Carbon isotopes**

308 The average  $\delta^{13}\text{C}$  values of the most abundant leaf wax alkanes are reported in Figure 2B and Table  
309 1. Among both cv M82 and *S. pennellii*, the *n*-alkanes are depleted relative to the *iso*-alkanes of  
310 length C<sub>31</sub> and C<sub>33</sub> by -1.4‰ and -1.2‰, respectively (Table 1). *S. pennellii* alkanes are consistently  
311 depleted in  $^{13}\text{C}$  relative to those of cv M82. Mass balance calculations for these four major alkanes,  
312 which comprise 84% of all alkane mass measured, indicate that the average  $\delta^{13}\text{C}$  values for carbon  
313 incorporated in the leaf waxes for cv M82 is -36.9‰ and -39.9‰ for *S. pennellii*.

### 314 **3.2 Leaf wax traits from IL plants**

#### 315 **3.2.1 Alkane methylation**

316 Methylation indices for the ILs range from 0.07 to 0.28 (Table 1 and Supplemental Figure 4), with an  
317 average value of 0.14. The percentages of *anteiso*- and *iso*-alkanes range from 2.8% to 15.7% and  
318 from 3.3% to 13.1%, respectively. No IL approaches the percent of *iso*-alkanes measured from *S.*



## Leaf wax genetics in *Solanum*

319 *pennellii* (43.6%). However, many ILs have a higher percentage of *anteiso*-alkanes than both *S.*  
320 *pennellii* and cv M82.

### 321 3.2.2 Structural traits

322 The CPI values for the *n*-alkanes range from 9.6 to 17.4, from 0.0 to 0.4 for the *anteiso*-alkanes, and  
323 from 5.8 to 21.2 for *iso*-alkanes (Supplemental Figure 5, Table 1). ACL values vary from 31.0 to  
324 31.8 for the *n*-alkanes, but alternate between odd and even predominance among the *anteiso*- and *iso*-  
325 alkanes, ranging from 31.9 to 32.3 and from 31.1 and 32.3, respectively (Supplemental Figure 6,  
326 Table 1).

### 327 3.2.3 Carbon isotopes

328 The ambient CO<sub>2</sub> δ<sup>13</sup>C values ranged from -19.3‰ to -14.1‰ during the IL growth period, with the  
329 average defined as -16.4‰. Apparent fractionation, <sup>13</sup>ε, is calculated according to Equation 2.  
330 Alkanes from the ILs vary in apparent fractionation compared to the alkanes from cv M82 (Table 1),  
331 ranging in <sup>13</sup>ε values from 13.1‰ to 22.0‰ (*i*-C<sub>31</sub>), from 14.5‰ to 24.5‰ (*n*-C<sub>31</sub>), 13.4‰ to 21.8‰  
332 (*i*-C<sub>33</sub>), and from 13.9‰ to 24.3‰ (*n*-C<sub>33</sub>). The ILs maintain the same pattern of carbon isotopic  
333 depletion of *n*- over *iso*-alkanes as measured from the parent alkanes. The magnitude of the depletion  
334 (δ<sub>*n*</sub> - δ<sub>*iso*</sub>) varies from -0.3 to -4.0 for C<sub>31</sub> alkanes and from -0.2 to -3.3 for C<sub>33</sub> alkanes.

### 335 3.3 Heritability and detected QTL

336 We modeled the suite of leaf wax traits measured from the ILs to estimate how much genetic factors  
337 play a role in differences in these traits between the IL plants and cv M82. Broad-sense heritability  
338 values ( $H^2$ ; Table 1 and Figure 2) for the leaf wax traits range from low ( $H^2 = 0.13$ ) to intermediate  
339 (0.39). The percentage of *anteiso*- ( $H^2 = 0.39$ ) and *iso*-alkanes (0.37) are of intermediate heritability,  
340 as are the magnitudes of carbon isotopic depletion of *n*- over *iso*-alkanes for C<sub>31</sub> (0.39) and C<sub>33</sub>  
341 (0.32). The methylation index ( $H^2 = 0.35$ ) is also of intermediate heritability. Traditional structural  
342 traits are also of intermediate heritability: CPI for *n*-alkanes ( $H^2 = 0.31$ ), *anteiso*-alkanes (0.27), and  
343 *iso*-alkanes (0.22), as well as ACL for *n*-alkanes (0.31), *anteiso*-alkanes (0.28), and *iso*-alkanes  
344 (0.26). Only the <sup>13</sup>ε values of individual alkane molecules are of low heritability ( $H^2 = 0.19$  for *i*-C<sub>31</sub>,  
345 0.18 for *n*-C<sub>31</sub>, 0.18 for *n*-C<sub>33</sub>, and 0.13 for *i*-C<sub>33</sub>).

346 We identified 156 QTLs at a significance level  $p < 0.05$  for 14 leaf wax summary traits in this study  
347 (Figure 4, Supplemental Table 1); no QTL were detected for the carbon-isotopic enrichment of *iso*-  
348 over *n*-alkanes for C<sub>33</sub>. 124 QTL are significant in the direction toward *S. pennellii*. The QTL are  
349 determined relative to cv M82 grown simultaneously with the ILs.

### 350 3.3.1 QTL regulating alkane methylation

351 QTL analysis may help to explain the genetic basis of variation in alkane methylation between *S.*  
352 *pennellii* and cv M82. *S. pennellii* has a greater methylation index (0.50) than any IL (varies from  
353 0.07 to 0.28; Table 1). Ten QTLs of methylation index are significant in the direction of *S. pennellii*,  
354 i.e. greater than the methylation index of cv M82 (Figure 4, Supplemental Table 1, Supplemental  
355 Figure 4), which may be attributed to the variation induced by genetic loci of the ILs. There are eight  
356 QTL significant in the *S. pennellii* direction for percentages of *iso*-alkanes (Figure 4, Supplemental  
357 Table 1), whereas one QTL is transgressive beyond cv M82 (IL 8-1). Despite the small difference in  
358 the percent of *anteiso*-alkanes between *S. pennellii* and cv M82 (Table 1), there are eleven QTLs

## Leaf wax genetics in *Solanum*

359 significant toward *S. pennellii* and one QTL that is transgressive beyond cv M82 (IL 7-5-5) (Figure 4,  
360 Supplemental Table 1).

361 Some ILs are identified as QTL for multiple alkane methylation traits. IL 3-2 displays the most  
362 significant increase in branched alkane production across three biological replicates, with an average  
363 methylation index of 0.26, 10.2% *iso*-alkanes, and 11.3% *anteiso*-alkanes. IL 1-1-2 has an average  
364 methylation index of 0.18, 8.9% *iso*-alkanes, and 9.3% *anteiso*-alkanes. From IL 1-1-3, we measured  
365 a methylation index of 0.20 and 10.5% *iso*-alkanes. IL 9-3-2 has a methylation index of 0.18 and  
366 10.9% *anteiso*-alkanes. IL 7-4 has a methylation index of 0.18 and 9.7% *anteiso*-alkanes. ILs 4-3, 6-  
367 4, and 10-3 have methylation indices of 0.17, and 11.8%, 9.0%, and 9.5% *anteiso*-alkanes,  
368 respectively.

### 369 3.3.2 QTL regulating CPI

370 Many QTL have been identified for CPI values: seven for *n*-alkanes, seven for *anteiso*-alkanes, and  
371 nineteen for *iso*-alkanes (Figure 4, Supplemental Table 1). For *n*-alkanes, the CPI values of identified  
372 QTL (between 13.5 to 16.2) are significant toward *S. pennellii*. Among *anteiso*-alkanes, the CPI  
373 values of identified QTL are all transgressive beyond cv M82. For the *iso*-alkanes, the identified  
374 QTL have CPI values ranging from 13.3 to 18.8 and are significant in the direction of *S. pennellii*.

### 375 3.3.3 QTL regulating ACL

376 Thirty-nine QTLs have been identified for the three types of ACL values: seven for *n*-alkanes,  
377 seventeen for *anteiso*-alkanes, and fifteen for *iso*-alkanes (Figure 4, Supplemental Table 1). Among  
378 ACL values for *n*-alkane, three QTLs are significant in the direction of *S. pennellii* and four QTLs  
379 are transgressive beyond cv M82. For the *anteiso*-alkane ACL values, two QTLs are significant  
380 toward *S. pennellii*, whereas the remaining 15 are transgressive beyond cv M82. All fifteen of the  
381 *iso*-alkane ACL QTLs are significant in the direction of *S. pennellii*.

### 382 3.3.4 QTL regulating carbon isotopic fractionation

383 We identified 54 QTLs for the five carbon isotope traits measured in this study: sixteen for  $^{13}\epsilon$  *i*-C<sub>31</sub>  
384 values, eleven for  $^{13}\epsilon$  *i*-C<sub>33</sub>, ten for  $^{13}\epsilon$  *n*-C<sub>31</sub>, eleven for  $^{13}\epsilon$  *n*-C<sub>33</sub>, six for  $\delta_n - \delta_{iso}$  (C<sub>31</sub>), and zero for  
385  $\delta_n - \delta_{iso}$  (C<sub>33</sub>), (Figure 4, Supplemental Table 1). For all of the measured  $^{13}\epsilon$  values, all QTLs are  
386 significant in the direction of *S. pennellii* and many QTLs overlap across all  $^{13}\epsilon$  values: IL 1-1, 2-1, 3-  
387 5, 8-3-1, 9-3, 9-3-1, and 12-4-1. For the six QTLs of  $\delta_n - \delta_{iso}$  (C<sub>31</sub>), two are significant toward *S.*  
388 *pennellii*.

## 389 3.4 Hierarchical clustering

### 390 3.4.1 Clustering of leaf wax traits

391 The clustering of leaf wax traits reveals similarities between the sets of trait measurements (Figure 5;  
392 Supplemental Dataset 7). Hierarchical clustering of wax traits groups the apparent fractionation  
393 values ( $^{13}\epsilon$ ) together. All of the ACL traits (*n*-, *iso*-, and *anteiso*-alkanes) cluster together. CPI values  
394 for *iso*-alkanes cluster with the percent of *iso*-alkanes, which co-cluster with the CPI of *n*-alkanes.  
395 The carbon isotopic differences between *n*- and *iso*-alkanes ( $\delta_n - \delta_{iso}$ ) cluster with each other. The  
396 methylation index and percent of *anteiso*-alkanes are clustered together, and co-cluster with the CPI  
397 of *anteiso*-alkanes.

## Leaf wax genetics in *Solanum*

398 Numerous structural leaf wax traits are significantly correlated with each other based on multiple  
399 test-adjusted  $p$ -values and Spearman's  $\rho$  correlation coefficient. Among the CPI values, CPI of  
400 *anteiso*-alkanes correlates negatively with the CPI of *iso*-alkanes ( $p = 0.047$ ,  $\rho = -0.28$ ). The CPI  
401 values of *iso*-alkanes correlate positively with the percent of *iso*-alkanes ( $p = 0.002$ ,  $\rho = 0.41$ ). The  
402 CPI values of *n*-alkanes is negatively correlated with each of the methylation traits (methylation  
403 index, percent of *iso*- and *anteiso*-alkanes). The ACL of *n*-alkanes is positively correlated with *iso*-  
404 ( $p = 0.00$ ,  $\rho = 0.82$ ) and *anteiso*-alkanes ( $p = 0.00$ ,  $\rho = 0.50$ ). The ACL of *iso*- and *anteiso*-alkanes  
405 are negatively correlated with the percent of *anteiso*-alkanes. All ACL values are negatively  
406 correlated with the percent of *anteiso*-alkanes: with ACL values of *n*- ( $p = 0.025$ ,  $\rho = -0.31$ ), *iso*- ( $p =$   
407  $0.003$ ,  $\rho = -0.39$ ), and *anteiso*-alkanes ( $p = 0.027$ ,  $\rho = -0.30$ ).

408 The methylation index is positively correlated with the percent of *iso*- and *anteiso*-alkanes and with  
409 the values of  $\delta_n - \delta_{iso}$  for both  $C_{31}$  and  $C_{33}$ , but negatively correlated with ACL of *iso*-alkanes. The  
410 percent of *anteiso*-alkanes correlates positively with  $\delta_n - \delta_{iso}$  values of  $C_{31}$  and negatively with  $\delta_n -$   
411  $\delta_{iso}$  values of  $C_{33}$ . The  $\Delta$  values of all alkanes correlate positively with the CPI of *iso*-alkanes, and the  
412  $^{13}\text{E}$  values of all alkanes except *n*- $C_{33}$  correlate positively with the percent of *iso*-alkanes. Most of the  
413 carbon isotopic traits significantly correlate with each other, except for  $\delta_n - \delta_{iso}$  ( $C_{33}$ ) with  $^{13}\text{E}$  *i*- $C_{31}$   
414 and  $^{13}\text{E}$  *i*- $C_{33}$ . The  $\Delta$  values are positively correlated with each other; the  $^{13}\text{E}$  values of *n*- $C_{31}$  and *n*- $C_{33}$   
415 are positively correlated with the  $\delta_n - \delta_{iso}$  values of  $C_{31}$ , but negatively correlated with the  $\delta_n - \delta_{iso}$   
416 values of  $C_{33}$  (see Supplemental Dataset 7 for  $p$  and  $\rho$  values).

### 417 3.4.2 Clustering of leaf wax traits with traits from previous studies

418 The traits measured in previous studies that cluster with WAX traits (Figure 6; Supplemental Figure  
419 3) may contain information about the relevance of leaf wax traits to plant metabolism, yield, and  
420 developmental leaf traits. The CPI values for *n*-alkanes cluster with the enzymatic activity of  
421 succinyl-coenzyme A ligase in the fruit pericarp, and co-clusters with levels of uracil in the fruit  
422 pericarp and with activity levels of starch in the fruit pericarp (Schauer et al., 2006, 2008; Steinhauser  
423 et al., 2011). The percentage and CPI values of *iso*-alkanes co-cluster with enzymatic activity of  
424 invertase and glucokinase in the fruit pericarp (Steinhauser et al., 2011).

425 Multiple leaf wax traits from this study significantly correlate with traits measured in previous *S.*  
426 *pennellii* IL studies (Figure 6; Supplemental Dataset 8). ACL values for *n*- and *iso*-alkanes positively  
427 correlate with enzymatic activities of glyceraldehyde 3-phosphate dehydrogenase (GADPH; for *n*-  
428 alkane ACL,  $p = 0.013$ ,  $\rho = 0.39$ ; for *iso*-alkane ACL,  $p = 0.039$ ,  $\rho = 0.34$ ; Steinhauser et al., 2011)  
429 within the fruit pericarp, which serves as a catalyst during glycolysis. *iso*-Alkane ACL values  
430 positively correlate with metabolite levels of glutamate within seeds ( $p = 0.033$ ,  $\rho = 0.36$ ; Toubiana  
431 et al., 2012), an amino acid used to synthesize proteins. ACL values for *anteiso*-alkanes positively  
432 correlate with aconitase ( $p = 0.040$ ,  $\rho = 0.34$ ) and Suc phosphate synthase ( $p = 0.044$ ,  $\rho = 0.34$ )  
433 enzymatic activity within the fruit pericarp (Steinhauser et al., 2011). CPI values for *iso*-alkanes  
434 positively correlate with the size of epidermal pavement cells ( $p = 0.033$ ,  $\rho = 0.36$ ; Chitwood et al.,  
435 2013), which form a protective layer for more specialized cells on leaves, and negatively correlate  
436 with fructose levels in the fruit pericarp ( $p = 0.033$ ,  $\rho = -0.35$ ; Steinhauser et al., 2011) and with the  
437 levels of metabolite trehalose within seeds ( $p = 0.022$ ,  $\rho = -0.39$ ; Toubiana et al., 2012).

438 Multiple flower morphological traits correlate positively with  $\delta_n - \delta_{iso}$  for  $C_{31}$ : anther length ( $p =$   
439  $0.041$ ,  $\rho = 0.34$ ), measures of the ratio of style length:width ( $p = 0.009$ ,  $\rho = 0.40$ ), and style length ( $p =$   
440  $0.001$ ,  $\rho = 0.49$ ). Conversely, these same traits negatively correlate with  $\delta_n - \delta_{iso}$  for  $C_{33}$ : anther  
441 length ( $p = 0.006$ ,  $\rho = -0.42$ ), measures of the ratio of style length:width ( $p = 0.022$ ,  $\rho = -0.37$ ), and

## Leaf wax genetics in *Solanum*

442 style length ( $p = 0.003$ ,  $\rho = -0.44$ ) (Schauer et al., 2006, 2008).  $\delta_n - \delta_{iso}$  for  $C_{31}$  correlates positively  
443 with levels of benzoate in the seeds ( $p = 0.032$ ,  $\rho = 0.36$ ; Toubiana et al., 2012) and negatively with  
444 enzymatic activities of phosphofructokinase a ( $p = 0.039$ ,  $\rho = -0.34$ ; Steinhauser et al., 2011), which  
445 is involved in sugar metabolism.  $\delta_n - \delta_{iso}$  for  $C_{33}$  correlates negatively with measures of fruit width ( $p$   
446  $= 0.038$ ,  $\rho = -0.35$ ) and weight ( $p = 0.012$ ,  $\rho = -0.39$ ), and with the weight of the seeds ( $p = 0.016$ ,  $\rho =$   
447  $-0.368$ ; Schauer et al., 2006, 2008). The values of  $\delta_n - \delta_{iso}$  for  $C_{33}$  correlate positively with the  
448 metabolic activity of fumarate in the fruit pericarp ( $p = 0.015$ ,  $\rho = 0.39$ ; Schauer et al., 2006, 2008)  
449 and with the levels of adenine within seeds ( $p = 0.046$ ,  $\rho = 0.35$ ; Toubiana et al., 2012). The number  
450 of flowers per inflorescence correlates negatively with  $^{13}\epsilon$  values for  $i-C_{31}$  ( $p = 0.011$ ,  $\rho = -0.42$ ;  
451 Schauer et al., 2006, 2008).

## 452 4 Discussion

453 Results from QTL analysis may help to explain the genetic basis of variation in leaf wax traits  
454 between *S. pennellii* and cv M82. As evidenced by the multiple QTL identified for nearly all leaf wax  
455 traits in this study (except for  $\delta_n - \delta_{iso}$  of  $C_{33}$ ; Figure 4, Supplemental Table 1), large portions of the  
456 genome contribute to natural variation in many leaf wax traits, suggesting that these traits are  
457 polygenic.

### 458 4.1 Alkane methylation

459 No IL has a methylation index or percent of *iso*-alkanes comparable to those of *S. pennellii* (Table 1).  
460 All methylation traits are of intermediate heritability (Figure 3), indicating that these traits are  
461 moderately influenced by genetic controls. ILs 1-1-2, 1-1-3, 1-4, and 3-2 are among the greatest  
462 contributing loci to alkane methylation, with significant QTL for both methylation indices and  
463 percentages of *iso*-alkanes (Figure 4; Supplemental Table 1). The variation among the QTL  
464 significant for methylation traits may be attributed to the variation induced by the genetic loci of the  
465 ILs.

466 We observed many significant correlations between methylation traits and other leaf wax traits  
467 (Figure 5; Supplemental Dataset 7). Among the ILs, the methylation traits decrease with increasing  
468 ACL for any type of alkane and with CPI of *n*- and *anteiso*-alkanes. However, methylation traits  
469 increase with increasing CPI values of *iso*-alkanes.

### 470 4.2 Structural traits

471 The prevalence of *n*- $C_{31}$  among the leaves of cv M82 and *S. pennellii* in this study is identical to that  
472 previously reported in the fruit cuticles of the same plants (Yeats et al., 2012). Reddy et al. (2000)  
473 measured that *iso*-alkanes are predominantly odd-numbered and that *anteiso*-alkanes are  
474 predominantly even-numbered among *Micromeria* plants, which is the same pattern noted for plants  
475 in this study. Among the *Micromeria* plants, the CPI values range from 5.6 to 7.2 for *n*-alkanes, from  
476 0.20 to 0.34 for *anteiso*-alkanes, and from 3.9 to 5.3 for *iso*-alkanes (Reddy et al., 2000). Compared  
477 to *S. pennellii* and cv M82 in this study, the CPI values for *anteiso*-alkanes from *Micromeria* are of  
478 similar magnitude, whereas the CPI values for *n*- (from 9.6 to 17.4; Table 1) and *iso*-alkanes (5.8 to  
479 21.2) have a greater range among the ILs.

480 Numerous studies have revealed correlations between *n*-alkane chain lengths and climatic variables  
481 such as temperature and humidity, as well as to the plant sources of the *n*-alkanes (e.g., Bush and  
482 McInerney, 2013 and references therein). Given this correlation, we might expect ACL values to be

## Leaf wax genetics in *Solanum*

483 different in plants that are adapted to different hydrological regimes (e.g., *S. pennellii* and cv M82)  
484 and low heritability of ACL traits. Instead, we observe nearly identical ACL values between *S.*  
485 *pennellii* and cv M82 (Table 1) and ACL values that are of intermediate heritability (Figure 3),  
486 suggesting a high degree of genetic control over their alkane chain-length distributions.

487 A benefit to studying the *S. pennellii* IL library is the ability to correlate phenotypic data sets across  
488 multiple growth studies in order to probe how leaf waxes relate to other phenotypes measured from  
489 the fruit and leaves of the same genetic variants. Our hierarchical clustering analysis reveals that  
490 ACL values for *anteiso*-alkanes positively correlate with aconitase enzymatic activity within the fruit  
491 pericarp (Figure 6; Supplemental Dataset 8; Steinhauser et al., 2011), which might be related to  
492 *anteiso*-alkane synthesis. Grice et al., (2008) propose that the methylbutyryl-CoA moiety derived  
493 from isoleucine is the precursor molecule for *anteiso*-alkanes. Oxaloacetate is the precursor for  
494 isoleucine synthesis. Aconitase catalyzes the isomerization of citrate to isocitrate, which can be  
495 cyclically decarboxylated into oxaloacetate for export to the chloroplast and used for isoleucine  
496 synthesis. Grice et al. (2008) suggest that isoleucine sourced from isocitrate might be isotopically  
497 heavy because it is sourced from the cytosol; in the present study, *anteiso*-alkanes are not abundant  
498 enough to make carbon isotope measurements. In our study, leaf wax traits do not correlate with  
499 levels of isoleucine or isocitrate measured from fruit pericarp or with isoleucine abundances  
500 measured in seeds.

### 501 4.3 Carbon isotopes

502 The  $^{13}\epsilon$  values for the four primary alkanes in this study have low broad-sense heritability values  
503 (Figure 3). The low heritability reflects the significant isotopic variation among biological replicates.  
504 A previous study into the bulk carbon isotopic composition of *Arabidopsis thaliana* grown in  
505 controlled growth chambers measured high heritability for bulk leaf  $\delta^{13}\text{C}$  values ( $H^2 = 0.67$ ; Easlon et  
506 al., 2014). The lower heritability found among  $\delta^{13}\text{C}$  of wax in this study may reflect the more  
507 variable environmental conditions of a greenhouse relative to a growth chamber, or a biological  
508 difference between *Arabidopsis* and *Solanum*. Broad-sense heritability is specific to the population  
509 and environment, thus the difference among results is not unexpected.

510 We observe that there is an intrinsic biological difference in  $\delta^{13}\text{C}$  values between *S. pennellii* and cv  
511 M82: *S. pennellii* alkanes are consistently depleted by roughly 3‰ in  $^{13}\text{C}$  relative to cv M82 (Figure  
512 2). Although the  $\delta^{13}\text{C}_{\text{CO}_2}$  values within the greenhouse varied by at least 3‰ during the growth  
513 period of the parent lines (Supplemental Figure 2; Supplemental Dataset 3), the offset in  $\delta^{13}\text{C}$  values  
514 likely does not result from different timing of carbon fixation between the plants, given that we  
515 sampled contemporaneous leaf material from all plants.

516 To explore the correlation between water use efficiency (which is estimated by carbon isotope  
517 composition) and stomatal conductance (Easlon et al., 2014), we tested our hierarchical clustering  
518 analysis for correlations between leaf stomatal density measurements made by Chitwood et al. (2013)  
519 and our leaf wax carbon isotope traits; however, our analysis yielded no significant correlations.

520 Among all plants in this study, *iso*-alkanes are enriched in  $^{13}\text{C}$  over *n*-alkanes, expressed here as  $\delta_n -$   
521  $\delta_{iso}$ . These traits are of intermediate heritability ( $H^2 = 0.38$  for  $\text{C}_{31}$  alkanes and  $H^2 = 0.32$  for  $\text{C}_{33}$   
522 alkanes; Figure 3), suggesting that the enrichment is strongly influenced by genetic controls. It is  
523 interesting that the isotopic enrichment is more heritable than individual carbon isotopic  
524 measurements. Reddy et al. (2000) noted no apparent differences in  $\delta^{13}\text{C}$  values between normal and  
525 branched alkanes in their study of four species of *Micromeria*. However, the enrichment pattern

## Leaf wax genetics in *Solanum*

526 observed in this study is consistent with that reported by Grice et al. (2008), who recorded that *iso*-  
527 alkanes are enriched by 0-1.8‰ over *n*-alkanes in *Nicotiana tabacum* (tobacco) plants. Grice et al.  
528 (2008) attributed this enrichment pattern to different biosynthetic precursors for *iso*- versus *n*-alkanes  
529 (i.e., valine for *iso*- and pyruvate for *n*-alkanes). Levels of valine and pyruvate have previously been  
530 measured from both the fruits (Schauer et al., 2006; 2008) and seeds (Toubiana et al., 2012) of the *S.*  
531 *pennellii* ILs; however, these traits do not significantly correlate with any WAX traits in this study.

### 532 **5 Implications for interpreting sedimentary plant waxes**

533 Although *S. lycopersicum* cv M82 and *S. pennellii* are not abundant producers of leaf waxes in  
534 terrestrial ecosystems, they nonetheless provide a useful tool for investigating plant genetics and  
535 physiology. We demonstrate in this study that the use of this model species complex allows us to  
536 determine the role of genetic versus environmental influences in the production of plant wax traits  
537 that are central to paleoclimatic reconstruction. This approach allows us to test the implicit  
538 assumptions in paleoclimate applications about the importance, or lack thereof, of genetic influence  
539 over leaf wax paleoclimate proxies.

540 Carbon isotope values ( $\delta^{13}\text{C}$ ) of plant materials from sediments can be used to identify ecosystems  
541 dominated by  $\text{C}_3$  versus  $\text{C}_4$  plants. Among individual plants,  $\delta^{13}\text{C}$  is positively correlated with water  
542 use efficiency of plants (e.g., Easlon et al., 2014), which can plastically respond to changing local  
543 rainfall and humidity. An implicit assumption for using  $\delta^{13}\text{C}$  values to interpret changes in water use  
544 efficiency is that the  $\delta^{13}\text{C}$  alkane signal is dominated by environmental rather than genetic  
545 information. By examining this assumption, we have quantified that the  $\delta^{13}\text{C}$  values of leaf waxes  
546 measured from plants in this study are strongly influenced by environmental variance ( $H^2$  ranges  
547 from 0.13 to 0.19). Our study reveals that genetic variance plays a limited role in driving variation of  
548 leaf wax carbon isotopic values among *Solanum* plants, and is consistent with the interpretation that  
549 variation in the  $\delta^{13}\text{C}$  of wax compounds, as recorded in sediments, is largely driven by  
550 paleohydrological changes. These findings do not bear on changes in the input of plants with a  
551 strongly different carbon fixation pathway, such as  $\text{C}_4$  plants.

552 Given the correlations between *n*-alkane chain lengths and climatic variables such as temperature and  
553 humidity, we might expect ACL values to be strongly influenced by environmental cues. Rather, we  
554 measure ACL values that are of intermediate heritability (0.30), suggesting a strong degree of genetic  
555 influence over alkane chain-length distributions. Future studies that utilize this model species  
556 complex in different environments might further illuminate the connection between alkane  
557 distributions and climatic variables.

558 All alkane methylation traits in this study are largely influenced by genetic variation, which is in  
559 agreement with the fact that branched alkanes have been identified from only a few modern plant  
560 families (see Introduction). The presence of branched alkanes in the sedimentary record might lend  
561 itself to chemotaxonomic applications, but it is unlikely that any of the branched alkane-producing  
562 plants are significant global contributors to terrestrial soil organic matter. However, regional  
563 chemotaxonomic applications of branched alkanes have proved useful. For example, Pautler et al.  
564 (2014) identified that an Arctic chickweed contributed to sedimentary organic matter based on the  
565 presence of branched alkanes. Fukushima et al. (2005) used the presence of *anteiso* compounds to  
566 suggest a local proxy for lake acidification. Branched alkanes and the methylation index can be more  
567 useful for chemotaxonomic applications on a regional level.

## Leaf wax genetics in *Solanum*

568 The *n*-alkane hydrogen isotope proxy ( $\delta^2\text{H}$ ) is assumed to record environmental information with  
569 minimal complications introduced from genetic variability. Thus, the environmental controls are  
570 assumed to be dominant over phenotypic variability. A future report will present results that examine  
571 this assumption under controlled conditions using this set of model organisms, and thus quantify the  
572 relative proportions of genetic and environmental influences over leaf wax  $\delta^2\text{H}$  values.

### 573 **6 Acknowledgements**

574 From assisting with plant collections to helping with isotopic analyses, laboratory manager Melanie  
575 Suess (Washington University in St. Louis) was instrumental to this project. We thank undergraduate  
576 researchers Jenny Zhang and Claire Ma (Washington University in St. Louis) for their contributions.  
577 We thank postdoctoral researchers Margaret Frank and Viktoriya Koneva (Donald Danforth Plant  
578 Science Center) and research scientist Jen Houghton (Washington University in St. Louis) for their  
579 assistance during leaf collection. We also thank David Fike and Dwight McCay (Washington  
580 University in St. Louis) for loaning and assisting with setup of the Picarro instrumentation. We thank  
581 Kevin Reilly (Donald Danforth Plant Science Center) for caring for the plants in the greenhouse, and  
582 Dani Zamir (Hebrew University, Rehovot, Israel), the Tomato Genetics Resource Center, and the lab  
583 of Neelima Sinha (University of California, Davis) for gifts of germplasm.

584 *Funding:* Acknowledgment is made to the Donors of the American Chemical Society Petroleum  
585 Research Fund for partial support of this research through PRF grant #53417-DNI2. Partial funding  
586 for this work was provided by I-CARES, Washington University in Saint Louis. We also  
587 acknowledge the support of Washington University in St. Louis and the Donald Danforth Plant  
588 Science Center.

### 589 **7 References**

590 Abramoff, M. D., Hospitals, I., Magalhães, P. J., and Abramoff, M. (2004). Image Processing with  
591 ImageJ. *Biophotonics Int.* 11, 36–42.

592 Benjamini, Y., and Hochberg, Y. (1995). Controlling the False Discovery Rate: A Practical and  
593 Powerful Approach to Multiple Testing. *J. R. Stat. Soc. Ser. B* 57, 289–300.

594 Bolger, A., Scossa, F., Bolger, M. E., Lanz, C., Maumus, F., Tohge, T., et al. (2014). The genome of  
595 the stress-tolerant wild tomato species *Solanum pennellii*. *Nat. Genet.* 46, 1034–1038.  
596 doi:10.1038/ng.3046.

597 Bush, R. T., and McInerney, F. a. (2013). Leaf wax *n*-alkane distributions in and across modern  
598 plants: Implications for paleoecology and chemotaxonomy. *Geochim. Cosmochim. Acta* 117,  
599 161–179. doi:10.1016/j.gca.2013.04.016.

600 Bush, R. T., and McInerney, F. A. (2015). Influence of temperature and C4 abundance on *n*-alkane  
601 chain length distributions across the central USA. *Org. Geochem.* 79, 65–73.  
602 doi:10.1016/j.orggeochem.2014.12.003.

603 Castañeda, I. S., Mulitza, S., Schefuss, E., dos Santos, R. A. L., Damste, J. S. S., and Schouten, S.  
604 (2009a). Wet phases in the Sahara/Sahel region and human migration patterns in North Africa.  
605 *Proc. Natl. Acad. Sci. U. S. A.* 106, 20159–20163. doi:Doi 10.1073/Pnas.0905771106.

## Leaf wax genetics in *Solanum*

- 606 Castañeda, I. S., Werne, J. P., Johnson, T. C., and Filley, T. R. (2009b). Late Quaternary vegetation  
607 history of southeast Africa: The molecular isotopic record from Lake Malawi. *Palaeogeogr.*  
608 *Palaeoclimatol. Palaeoecol.* 275, 100–112. doi:10.1016/j.palaeo.2009.02.008.
- 609 Chitwood, D. H., Kumar, R., Headland, L. R., Ranjan, A., Covington, M. F., Ichihashi, Y., et al.  
610 (2013). A quantitative genetic basis for leaf morphology in a set of precisely defined tomato  
611 introgression lines. *Plant Cell* 25, 2465–81. doi:10.1105/tpc.113.112391.
- 612 Diefendorf, A. F., Freeman, K. H., Wing, S. L., and Graham, H. V. (2011). Production of n-alkyl  
613 lipids in living plants and implications for the geologic past. *Geochim. Cosmochim. Acta* 75,  
614 7472–7485. doi:10.1016/j.gca.2011.09.028.
- 615 Diefendorf, A. F., Mueller, K. E., Wing, S. L., Koch, P. L., and Freeman, K. H. (2010). Global  
616 patterns in leaf  $^{13}\text{C}$  discrimination and implications for studies of past and future climate. *Proc.*  
617 *Natl. Acad. Sci.* 107, 5738–5743. doi:10.1073/pnas.0910513107.
- 618 Easlon, H. M., Nemali, K. S., Richards, J. H., Hanson, D. T., Juenger, T. E., and McKay, J. K.  
619 (2014). The physiological basis for genetic variation in water use efficiency and carbon isotope  
620 composition in *Arabidopsis thaliana*. *Photosynth. Res.* 119, 119–129. doi:10.1007/s11120-013-  
621 9891-5.
- 622 Eglinton, G., Gonzalez, A. G., Hamilton, R. J., and Raphael, R. A. (1962). Hydrocarbon Constituents  
623 of the Wax Coatings of Plant Leaves: A Taxonomic Survey. *Phytochemistry* 1, 89–102.
- 624 Eglinton, T. I., Eglinton, G., Dupont, L. M., Sholkovitz, E. R., Montluçon, D., and Reddy, C. M.  
625 (2002). Composition, age, and provenance of organic matter in NW African dust over the  
626 Atlantic Ocean. *Geochemistry, Geophys. Geosystems* 3, 27p. doi:10.1029/2001GC000269.
- 627 Eshed, Y., and Zamir, D. (1995). An Introgression Line Population of *Lycopersicon pennellii* in the  
628 Cultivated Tomato Enables the Identification and Fine Mapping of Yield-Associated QTL.  
629 *Genetics* 141, 1147–1162.
- 630 Farquhar, G. D., Ehleringer, J. R., and Hubick, K. T. (1989). Carbon Isotope Discrimination and  
631 Photosynthesis. *Annu. Rev. Plant Physiol. Plant Mol. Biol.* 40, 503–537. doi:1040-  
632 2519/89/0601-503.
- 633 Feakins, S. J., Eglinton, T. I., and deMenocal, P. B. (2007). A comparison of biomarker records of  
634 northeast African vegetation from lacustrine and marine sediments (ca. 3.40 Ma). *Org.*  
635 *Geochem.* 38, 1607–1624. doi:10.1016/j.orggeochem.2007.06.008.
- 636 Feakins, S. J., Peter, B., and Eglinton, T. I. (2005). Biomarker records of late Neogene changes in  
637 northeast African vegetation. *Geology* 33, 977–980. doi:10.1130/G21814.1.
- 638 Feakins, S. J., and Sessions, A. L. (2010). Controls on the D/H ratios of plant leaf waxes in an arid  
639 ecosystem. *Geochim. Cosmochim. Acta* 74, 2128–2141. doi:10.1016/j.gca.2010.01.016.
- 640 Fobes, J. F., Mudd, B. J., and Marsden, M. P. F. (1985). Epicuticular Lipid Accumulation on the  
641 Leaves of *Lycopersicon pennellii* (Corr.) D’Arcy and *Lycopersicon esculentum* Mill. *Plant*  
642 *Physiol.* 77, 567–570.



## Leaf wax genetics in *Solanum*

- 643 Fukushima, K., Yoda, A., Kayama, M., and Miki, S. (2005). Implications of long-chain anteiso  
644 compounds in acidic freshwater lake environments: Inawashiro-ko in Fukushima Prefecture,  
645 Japan. *Org. Geochem.* 36, 311–323. doi:10.1016/j.orggeochem.2004.07.014.
- 646 Futuyama, D. J. (1998). *Evolutionary Biology*. 3rd ed. Sunderland, Massachusetts: Sinauer Associates,  
647 Inc.
- 648 Gao, L., Edwards, E. J., Zeng, Y., and Huang, Y. (2014). Major evolutionary trends in hydrogen  
649 isotope fractionation of vascular plant leaf waxes. *PLoS One* 9.  
650 doi:10.1371/journal.pone.0112610.
- 651 Gao, L., Guimond, J., Thomas, E., and Huang, Y. (2015). Major trends in leaf wax abundance,  $\delta^2\text{H}$   
652 and  $\delta^{13}\text{C}$  values along leaf venation in five species of C3 plants: Physiological and geochemical  
653 implications. *Org. Geochem.* 78, 144–152. doi:10.1016/j.orggeochem.2014.11.005.
- 654 Girard, A.-L., Mounet, F., Lemaire-Chamley, M., Gaillard, C., Elmorjani, K., Vivancos, J., et al.  
655 (2012). Tomato GDSL1 is required for cutin deposition in the fruit cuticle. *Plant Cell* 24, 3119–  
656 34. doi:10.1105/tpc.112.101055.
- 657 Grice, K., Lu, H., Zhou, Y., Stuart-Williams, H., and Farquhar, G. D. (2008). Biosynthetic and  
658 environmental effects on the stable carbon isotopic compositions of anteiso- (3-methyl) and iso-  
659 (2-methyl) alkanes in tobacco leaves. *Phytochemistry* 69, 2807–2814.  
660 doi:10.1016/j.phytochem.2008.08.024.
- 661 Heemann, V., Brümmer, U., Paulsen, C., and Seehofer, F. (1983). Composition of the leaf surface  
662 gum of some *Nicotiana* species and *Nicotiana tabacum* cultivars. *Phytochemistry* 22, 133–135.  
663 doi:10.1016/S0031-9422(00)80073-4.
- 664 Hou, J., D’Andrea, W. J., MacDonald, D., and Huang, Y. (2007a). Evidence for water use efficiency  
665 as an important factor in determining the  $\delta\text{D}$  values of tree leaf waxes. *Org. Geochem.* 38,  
666 1251–1255. doi:10.1016/j.orggeochem.2007.03.011.
- 667 Hou, J., D’Andrea, W. J., MacDonald, D., and Huang, Y. (2007b). Hydrogen isotopic variability in  
668 leaf waxes among terrestrial and aquatic plants around Blood Pond, Massachusetts (USA). *Org.*  
669 *Geochem.* 38, 977–984. doi:10.1016/j.orggeochem.2006.12.009.
- 670 Huang, X., Meyers, P. a., Wu, W., Jia, C., and Xie, S. (2011). Significance of long chain iso and  
671 anteiso monomethyl alkanes in the Lamiaceae (mint family). *Org. Geochem.* 42, 156–165.  
672 doi:10.1016/j.orggeochem.2010.11.008.
- 673 Jetter, R., Kunst, L., and Samuels, L. (2006). “Composition of plant cuticular waxes,” in *Biology of*  
674 *the Plant Cuticle*, 145–181.
- 675 Kosma, D. K., Bourdenx, B., Bernard, a., Parsons, E. P., Lu, S., Joubes, J., et al. (2009). The Impact  
676 of Water Deficiency on Leaf Cuticle Lipids of *Arabidopsis*. *Plant Physiol.* 151, 1918–1929.  
677 doi:10.1104/pp.109.141911.
- 678 Naafs, B. D. A., Hefter, J., Acton, G., Haug, G. H., Martínez-García, A., Pancost, R., et al. (2012).  
679 Strengthening of North American dust sources during the late Pliocene (2.7Ma). *Earth Planet.*

## Leaf wax genetics in *Solanum*

- 680 *Sci. Lett.* 317–318, 8–19. doi:10.1016/j.epsl.2011.11.026.
- 681 Pautler, B. G., Austin, J., Otto, A., Stewart, K., Lamoureux, S. F., Simpson, M. J., et al. (2014).  
682 Biomarker assessment of organic matter sources and degradation in Canadian High Arctic  
683 littoral sediments. *Biogeochemistry* 100, 75–87. doi:10.1007/s10533-009-9405-x.
- 684 Polissar, P. J., and D'Andrea, W. J. (2014). Uncertainty in paleohydrologic reconstructions from  
685 molecular  $\delta D$  values. *Geochim. Cosmochim. Acta* 129, 146–156. doi:10.1016/j.gca.2013.12.021.
- 686 Reddy, C. M., Eglinton, T. I., Palić, R., Benitez-Nelson, B. C., Stojanović, G., Palić, I., et al. (2000).  
687 Even carbon number predominance of plant wax n-alkanes: A correction. *Org. Geochem.* 31,  
688 331–336. doi:10.1016/S0146-6380(00)00025-5.
- 689 Rogge, W., and Hildemann, L. (1994). Sources of fine organic aerosol. 6. Cigarette smoke in the  
690 urban atmosphere. *Environ. Sci. Technol.* 28, 1375–1388. doi:10.1021/es00056a030.
- 691 Sachse, D., Billault, I., Bowen, G. J., Chikaraishi, Y., Dawson, T. E., Feakins, S. J., et al. (2012).  
692 Molecular Paleohydrology: Interpreting the Hydrogen-Isotopic Composition of Lipid  
693 Biomarkers from Photosynthesizing Organisms. *Annu. Rev. Earth Planet. Sci.* 40, 221–249.  
694 Available at: <http://www.annualreviews.org/doi/abs/10.1146/annurev-earth-042711-105535>.
- 695 Schauer, N., Semel, Y., Balbo, I., Steinfath, M., Repsilber, D., Selbig, J., et al. (2008). Mode of  
696 Inheritance of Primary Metabolic Traits in Tomato. *Plant Cell* 20, 509–523.  
697 doi:10.1105/tpc.107.056523.
- 698 Schauer, N., Semel, Y., Roessner, U., Gur, A., Balbo, I., Carrari, F., et al. (2006). Comprehensive  
699 metabolic profiling and phenotyping of interspecific introgression lines for tomato  
700 improvement. *Nat. Biotechnol.* 24, 447–454. doi:10.1038/nbt1192.
- 701 Schubert, B. A., and Jahren, A. H. (2012). The effect of atmospheric CO<sub>2</sub> concentration on carbon  
702 isotope fractionation in C<sub>3</sub> land plants. *Geochim. Cosmochim. Acta* 96, 29–43.
- 703 Silva, K. M. M. Da, Agra, M. D. F., Santos, D. Y. A. C. Dos, and Oliveira, A. F. M. De (2012). Leaf  
704 cuticular alkanes of *Solanum* subg. *Leptostemonum* Dunal (Bitter) of some northeast Brazilian  
705 species: Composition and taxonomic significance. *Biochem. Syst. Ecol.* 44, 48–52.  
706 doi:10.1016/j.bse.2012.04.010.
- 707 Smirnova, A., Leide, J., and Riederer, M. (2013). Deficiency in a very-long-chain fatty acid  $\beta$ -  
708 ketoacyl-coenzyme a synthase of tomato impairs microgametogenesis and causes floral organ  
709 fusion. *Plant Physiol.* 161, 196–209. doi:10.1104/pp.112.206656.
- 710 Smith, F. a., and Freeman, K. H. (2006). Influence of physiology and climate on  $\delta D$  of leaf wax n-  
711 alkanes from C<sub>3</sub> and C<sub>4</sub> grasses. *Geochim. Cosmochim. Acta* 70, 1172–1187.  
712 doi:10.1016/j.gca.2005.11.006.
- 713 Smith, R. M., Marshall, J. A., Davey, M. R., Lowe, K. C., and Power, J. B. (1996). Comparison of  
714 volatiles and waxes in leaves of genetically engineered tomatoes. *Phytochemistry* 43, 753–758.
- 715 Steinhauser, M.-C., Steinhauser, D., Gibon, Y., Bolger, M., Arrivault, S., Usadel, B., et al. (2011).  
716 Identification of Enzyme Activity Quantitative Trait Loci in a *Solanum lycopersicum* x *Solanum*

## Leaf wax genetics in *Solanum*

- 717 pennellii Introgression Line Population. *Plant Physiol.* 157, 998–1014.  
718 doi:10.1104/pp.111.181594.
- 719 Szafranek, B. M., and Synak, E. E. (2006). Cuticular waxes from potato (*Solanum tuberosum*)  
720 leaves. *Phytochemistry* 67, 80–90. doi:10.1016/j.phytochem.2005.10.012.
- 721 Team, R. D. C. (2015). R: A Language and Environment for Statistical Computing.
- 722 Tipple, B. J., Berke, M. a, Doman, C. E., Khachatryan, S., and Ehleringer, J. R. (2013). Leaf-wax n-  
723 alkanes record the plant-water environment at leaf flush. *Proc. Natl. Acad. Sci. U. S. A.* 110,  
724 2659–64. doi:10.1073/pnas.1213875110.
- 725 Tipple, B. J., and Pagani, M. (2010). A 35Myr North American leaf-wax compound-specific carbon  
726 and hydrogen isotope record: Implications for C4 grasslands and hydrologic cycle dynamics.  
727 *Earth Planet. Sci. Lett.* 299, 250–262. doi:10.1016/j.epsl.2010.09.006.
- 728 Toubiana, D., Semel, Y., Tohge, T., Beleggia, R., Cattivelli, L., Rosental, L., et al. (2012). Metabolic  
729 Profiling of a Mapping Population Exposes New Insights in the Regulation of Seed Metabolism  
730 and Seed, Fruit, and Plant Relations. *PLoS Genet.* 8, 1–22. doi:10.1371/journal.pgen.1002612.
- 731 Warnock, S. J. (1991). Natural Habitats of *Lycopersicon* Species. *HortScience* 26, 1–6.
- 732 Yeats, T. H., Buda, G. J., Wang, Z., Chehanovsky, N., Moyle, L. C., Jetter, R., et al. (2012). The fruit  
733 cuticles of wild tomato species exhibit architectural and chemical diversity, providing a new  
734 model for studying the evolution of cuticle function. *Plant J.* 69, 655–66. doi:10.1111/j.1365-  
735 313X.2011.04820.x.

## 736 8 Tables and Figures

737 **Table 1. Leaf wax traits for *S. lycopersicum*, *S. pennellii*, and ILs.** Average leaf wax trait values  
738 and standard deviations shown for the two parent lines grown simultaneously and for cv M82 grown  
739 with the ILs, and average trait values and ranges shown for IL plants. Broad sense heritability values  
740 ( $H^2$ ) shown as estimated for ILs. First column of data for *S. lycopersicum* and *S. pennellii* are from  
741 the first growth experiment; extra column of data for *S. lycopersicum* cv M82 and ILs are from the  
742 second growth experiment. \* Indicates  $\delta^{13}\text{C}$  values reported.

| Traits                         | cv M82 |       | <i>S. pennellii</i> |       | cv M82<br>(with ILs) |       | ILs  |              | $H^2$ |
|--------------------------------|--------|-------|---------------------|-------|----------------------|-------|------|--------------|-------|
|                                | Mean   | Stdev | Mean                | Stdev | Mean                 | Stdev | Mean | Range        |       |
| <b>Methylation index</b>       | 0.15   | 0.02  | 0.50                | 0.04  | 0.13                 | 0.01  | 0.14 | 0.07 to 0.28 | 0.35  |
| <b>Percent anteiso-alkanes</b> | 6.1    | 1.5   | 6.8                 | 1.1   | 6.3                  | 0.5   | 7.5  | 2.8 to 15.7  | 0.39  |

## Leaf wax genetics in *Solanum*

|                                                                                                         |        |     |        |     |      |     |      |              |      |
|---------------------------------------------------------------------------------------------------------|--------|-----|--------|-----|------|-----|------|--------------|------|
| <b>Percent<br/><i>iso</i>-alkanes</b>                                                                   | 8.8    | 0.7 | 43.6   | 2.6 | 6.5  | 0.7 | 7.0  | 3.3 to 13.1  | 0.37 |
| <b>CPI<br/>[<i>n</i>-alkane]</b>                                                                        | 10.4   | 0.4 | 11.2   | 1.3 | 11.8 | 0.8 | 12.5 | 9.6 to 17.4  | 0.31 |
| <b>CPI [<i>anteiso</i>-<br/>alkane]</b>                                                                 | 0.0    | 0.1 | 0.0    | 0.0 | 0.2  | 0.1 | 0.2  | 0.0 to 0.4   | 0.27 |
| <b>CPI<br/>[<i>iso</i>-alkane]</b>                                                                      | 10.2   | 0.6 | 19.4   | 2.5 | 9.6  | 1.7 | 12.3 | 5.8 to 21.2  | 0.22 |
| <b>ACL<br/>[<i>n</i>-alkane]</b>                                                                        | 31.5   | 0.0 | 31.5   | 0.1 | 31.3 | 0.1 | 31.3 | 31.0 to 31.8 | 0.30 |
| <b>ACL<br/>[<i>anteiso</i>-<br/>alkane]</b>                                                             | 32.1   | 0.0 | 32.2   | 0.0 | 32.1 | 0.1 | 32.1 | 31.9 to 32.3 | 0.28 |
| <b>ACL<br/>[<i>iso</i>-alkane]</b>                                                                      | 31.8   | 0.1 | 31.8   | 0.1 | 31.9 | 0.1 | 31.8 | 31.1 to 32.3 | 0.26 |
| <b><math>\delta^{13}\text{C}^*</math> or <math>^{13}\epsilon</math><br/><i>i</i>-C<sub>31</sub> (‰)</b> | -35.7* | 0.8 | -39.0* | 0.9 | 16.7 | 2.0 | 18.2 | 13.1 to 22.0 | 0.18 |
| <b><math>\delta^{13}\text{C}^*</math> or <math>^{13}\epsilon</math><br/><i>n</i>-C<sub>31</sub> (‰)</b> | -37.0* | 0.9 | -40.4* | 0.9 | 18.5 | 2.4 | 20.0 | 14.5 to 24.5 | 0.18 |
| <b><math>\delta^{13}\text{C}^*</math> or <math>^{13}\epsilon</math><br/><i>i</i>-C<sub>33</sub> (‰)</b> | -35.8* | 0.7 | -39.5* | 1.0 | 16.4 | 2.0 | 18.0 | 13.4 to 21.8 | 0.13 |
| <b><math>\delta^{13}\text{C}^*</math> or <math>^{13}\epsilon</math><br/><i>n</i>-C<sub>33</sub> (‰)</b> | -36.8* | 1.0 | -40.7* | 1.1 | 17.9 | 2.2 | 19.5 | 13.9 to 24.3 | 0.18 |
| <b><math>\delta_n - \delta_{iso}</math> (C<sub>31</sub>)<br/>(‰)</b>                                    | -1.4   | 0.5 | -1.4   | 0.3 | -1.6 | 0.3 | -1.7 | -0.3 to -4.0 | 0.39 |
| <b><math>\delta_n - \delta_{iso}</math> (C<sub>33</sub>)<br/>(‰)</b>                                    | -1.2   | 0.4 | -1.2   | 0.5 | -1.4 | 0.3 | -1.4 | -0.2 to -3.3 | 0.32 |

### 743 8.1 Figure legends

## Leaf wax genetics in *Solanum*

744 **Figure 1: Density plot of  $n$ -C<sub>29</sub> and  $n$ -C<sub>31</sub> alkane  $\delta^{13}\text{C}$  values from C<sub>3</sub> and C<sub>4</sub> plants.**  $n$ -C<sub>29</sub> (solid  
745 lines) and  $n$ -C<sub>31</sub> (dashed lines) alkanes from C<sub>3</sub> plants (red) show a  $1\sigma$  variation of 3.3‰ and 3.0‰,  
746 respectively, while the same alkanes have  $1\sigma$  variations of 2.3‰ and 2.3‰ in C<sub>4</sub> plants (green). Data  
747 shown are from 10 published studies (see Supplementary Dataset 1).

748 **Figure 2: Leaf waxes from *S. lycopersicum* cv M82 and *S. pennellii*.** (A) Concentration of leaf  
749 wax molecules, with unbranched (normal, left) and branched (right) alkanes. Average concentration  
750 values ( $\mu\text{g/g}$  leaf dry mass) of ten biological replicates are shown with error bars showing one  
751 standard deviation of the mean. *S. pennellii* (blue) contains much higher amounts of *iso*-alkanes than  
752 *S. lycopersicum* (orange). (B) Carbon isotope values ( $\delta^{13}\text{C}$ ) measured from ten biological replicates  
753 analyzed in triplicate; analytical uncertainty  $\pm 0.2\text{‰}$ , error bars represent standard deviation of  
754 biological replicates. The pattern of *iso*- over *n*-alkane enrichment is consistent between both species.  
755 Additionally,  $\delta^{13}\text{C}$  values from *S. pennellii* (blue) are consistently depleted relative to those from *S.*  
756 *lycopersicum* (orange).

757 **Figure 3: Broad-sense heritability for leaf wax traits.** Colors denote traits with intermediate  
758 (yellow,  $0.2 \leq H^2 < 0.4$ ), and low (green,  $H^2 < 0.2$ ) heritability values. All traits were measured from  
759 plants grown under 2014 St. Louis, MO greenhouse conditions. The majority of leaf wax traits have  
760 intermediate heritability values. CPI measured from *anteiso*-alkanes and individual carbon isotope  
761 values have low heritability values.

762 **Figure 4: Detected leaf wax QTLs.** Shown are QTL with  $p$ -value  $< 0.05$ , as calculated from mixed-  
763 effect linear models for deviation of ILs from cv M82. In total, 139 QTLs were detected. Traits are  
764 grouped by type: from left to right, structural, carbon isotope, and methylation traits. White spaces  
765 represent traits for which no IL replicates had quantifiable data.

766 **Figure 5: Hierarchical clustering and correlation of leaf wax traits.** Hierarchical clustering and  
767 heat map of leaf wax traits measured in this study with each other. The upper quadrant shows  
768 correlation  $p$ -values; gray indicates non-significant  $p$ -values ( $p > 0.05$ ), whereas the spectrum of  
769 orange to purple colors designate  $p$ -values ranging from less to more significant, respectively. The  
770 lower quadrant indicates Spearman's  $\rho$  values in red (negative), white (neutral), and green (positive).

771 **Figure 6: Hierarchical clustering and correlation of leaf wax traits with previously measured**  
772 **IL traits.** Hierarchical clustering of leaf wax traits from this study with traits measured in previous  
773 studies (see close-up of the hierarchical clustering in Supplemental Figure 3). WAX (green) are leaf  
774 wax traits from this study; DEV (black), leaf developmental traits from Chitwood *et al.* (2013); MOR  
775 (pink), entire-plant, yield, and reproductive morphological traits from Schauer *et al.* (2006, 2008);  
776 MET (blue), metabolic traits from the two previous studies; ENZ (yellow), enzymatic activities from  
777 Steinhäuser *et al.* (2011); SEED (orange), seed metabolites as measured by Toubiana *et al.* (2012).  
778 Hierarchical clustering is based on absolute correlation values. The upper quadrant shows significant  
779 correlations ( $p < 0.05$ ) between traits after multiple test adjustment, shown in black. The lower  
780 quadrant indicates Spearman's  $\rho$  values in red (negative), white (neutral), and green (positive).

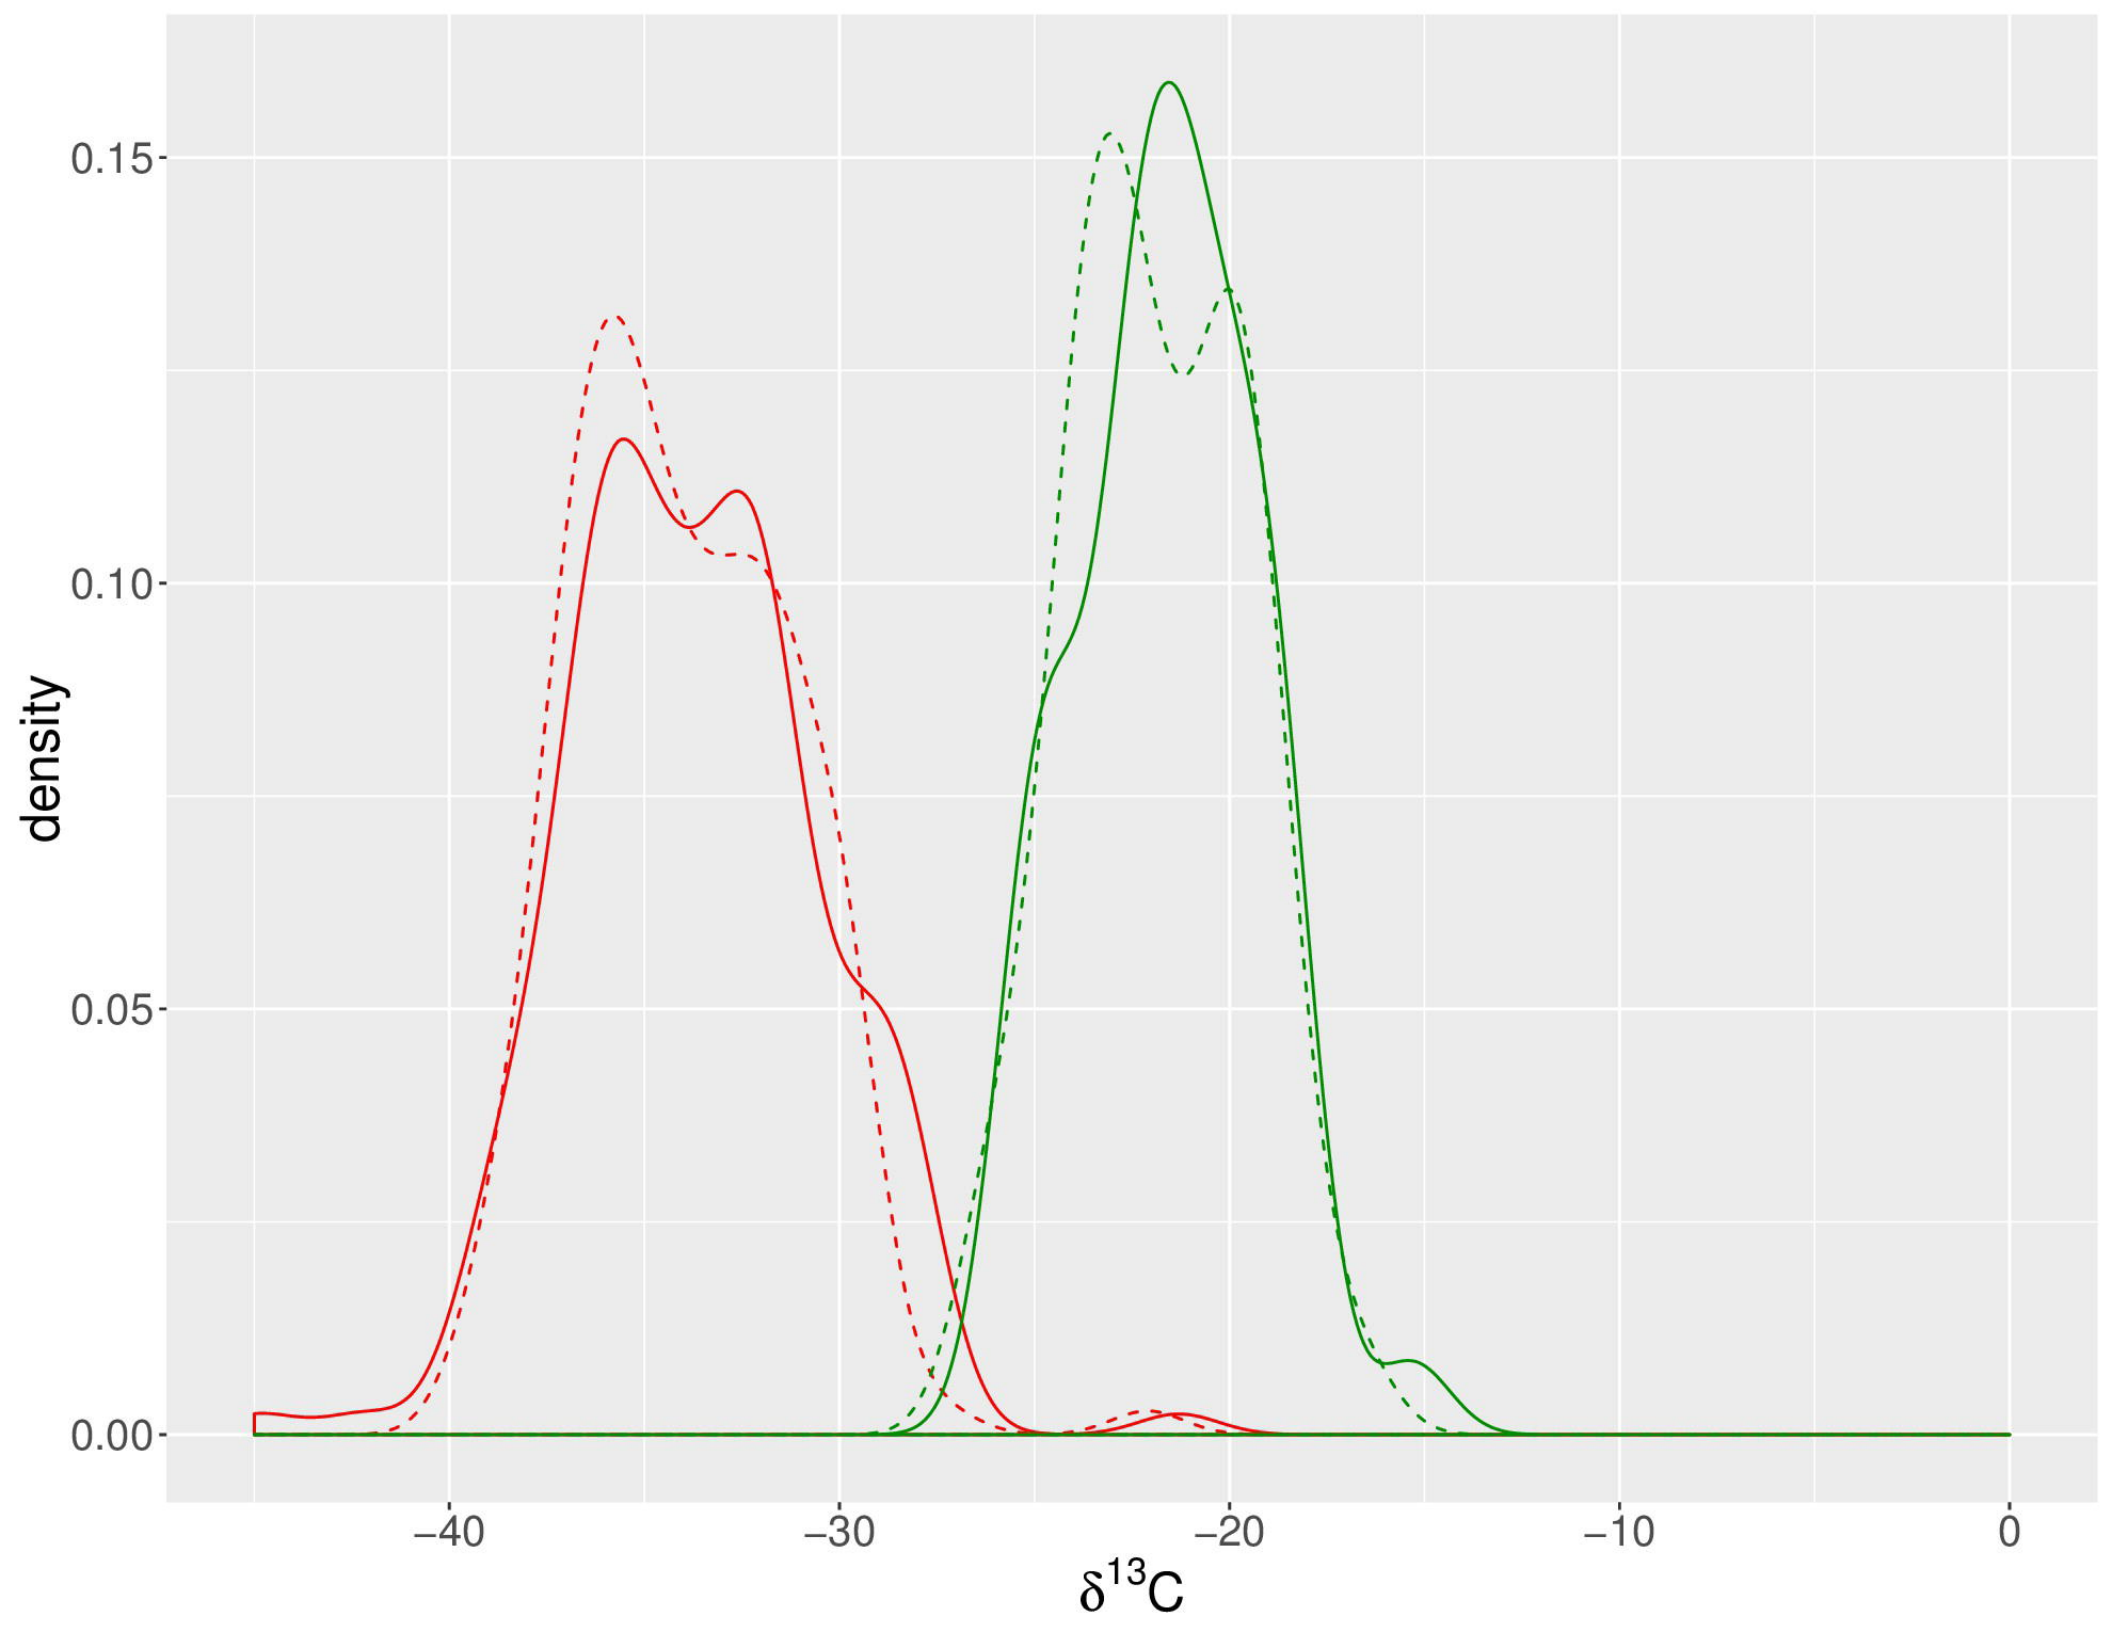

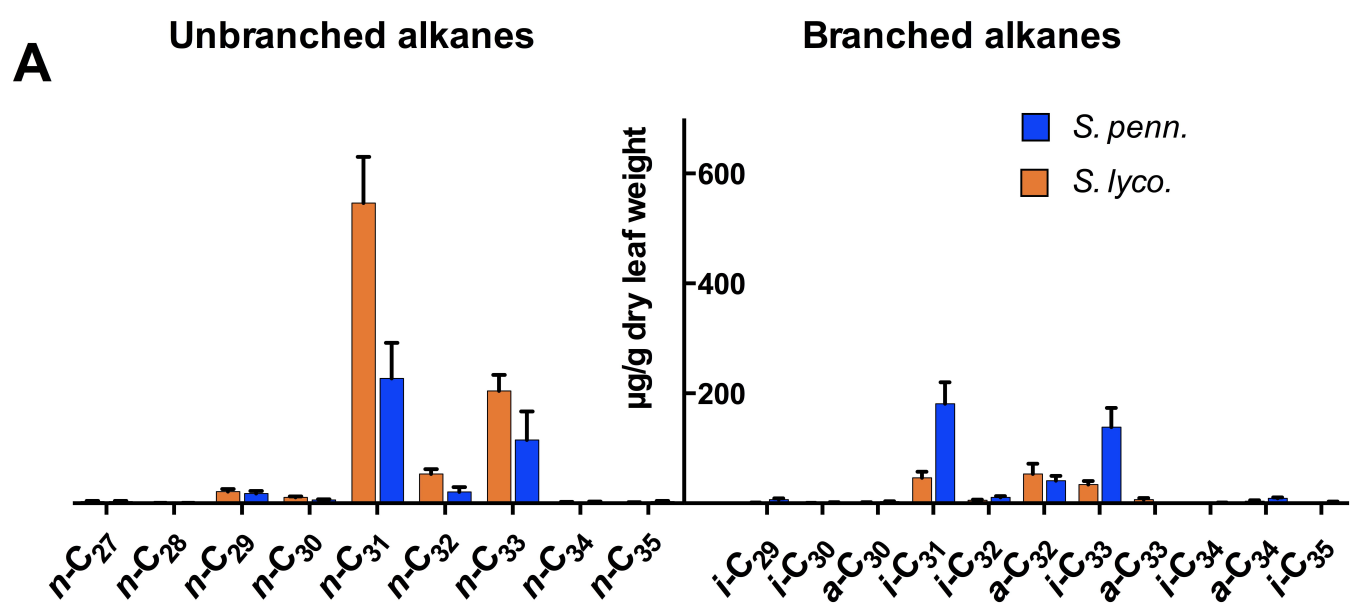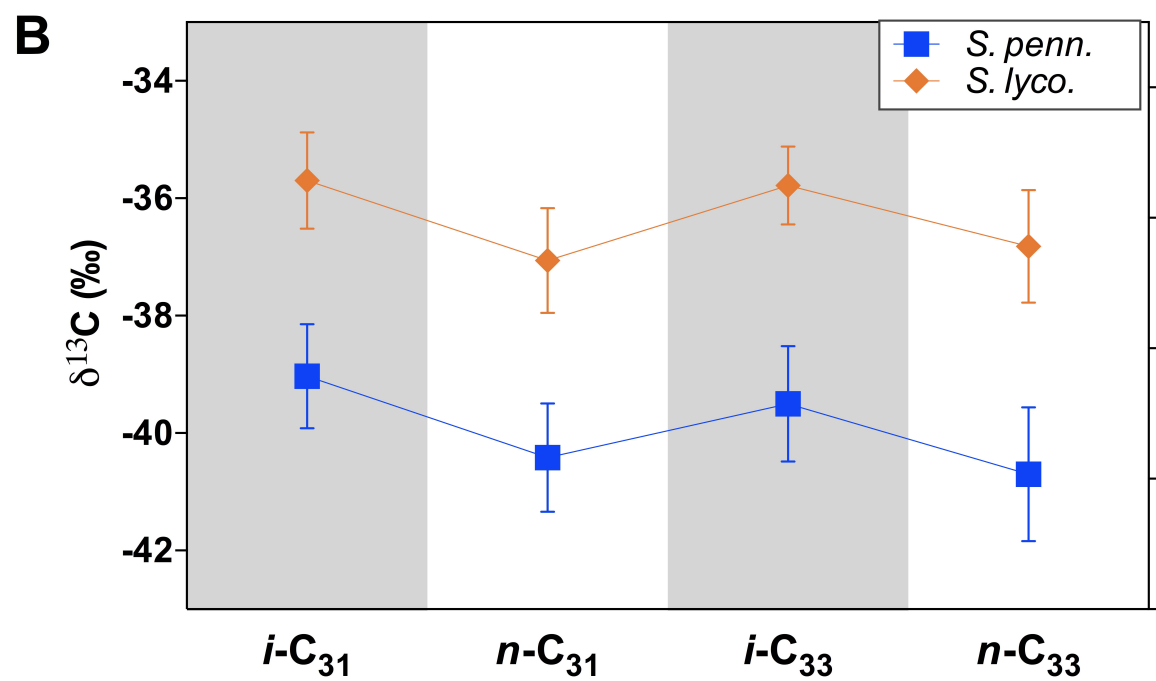

# Trait

# $H^2$

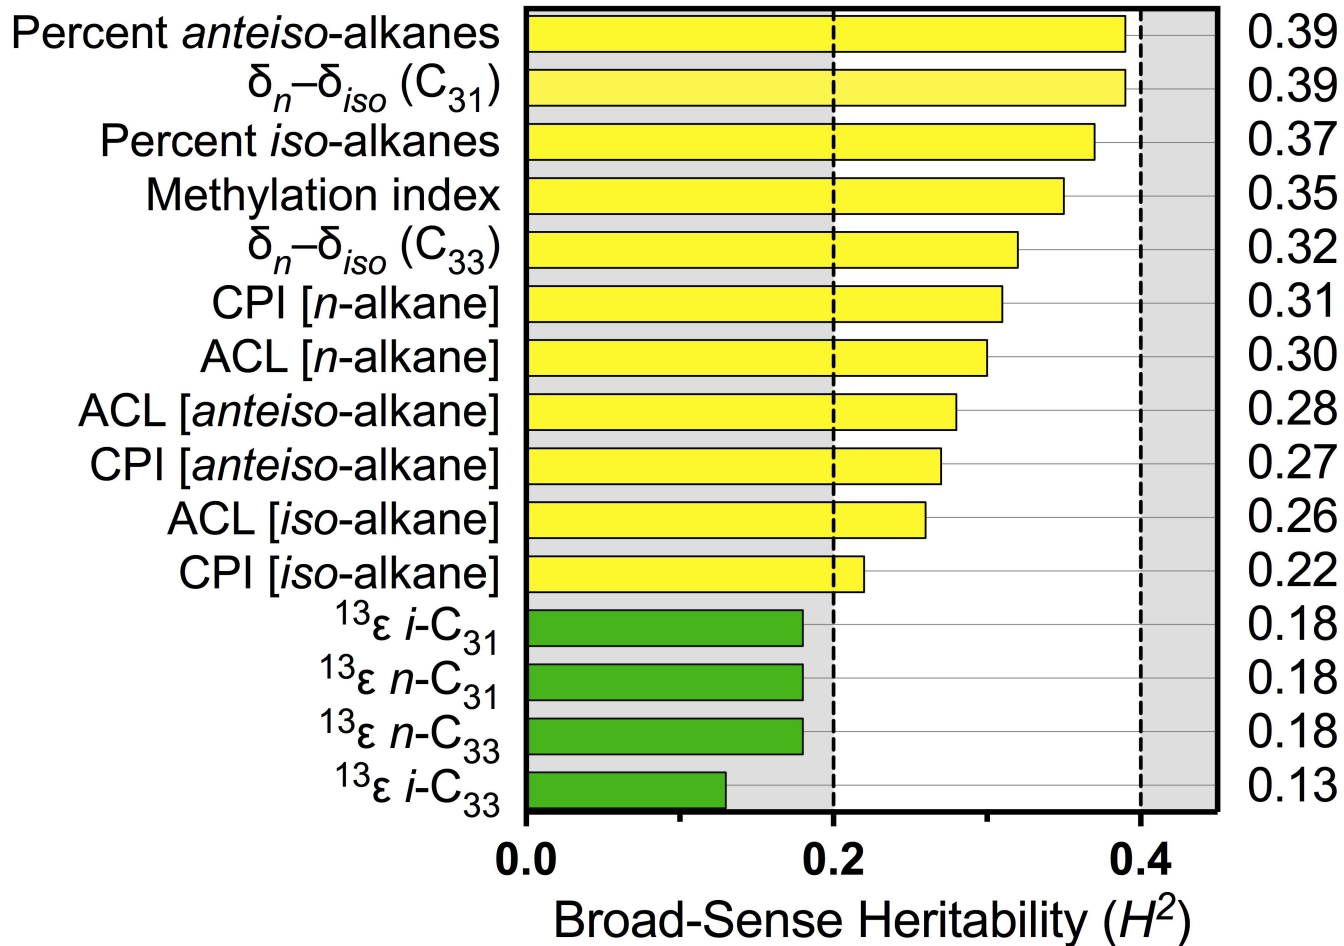





**KEY:**

p-values ( $-\log_{10}$ )

rho values

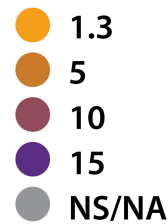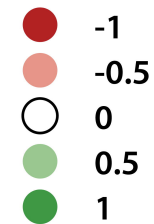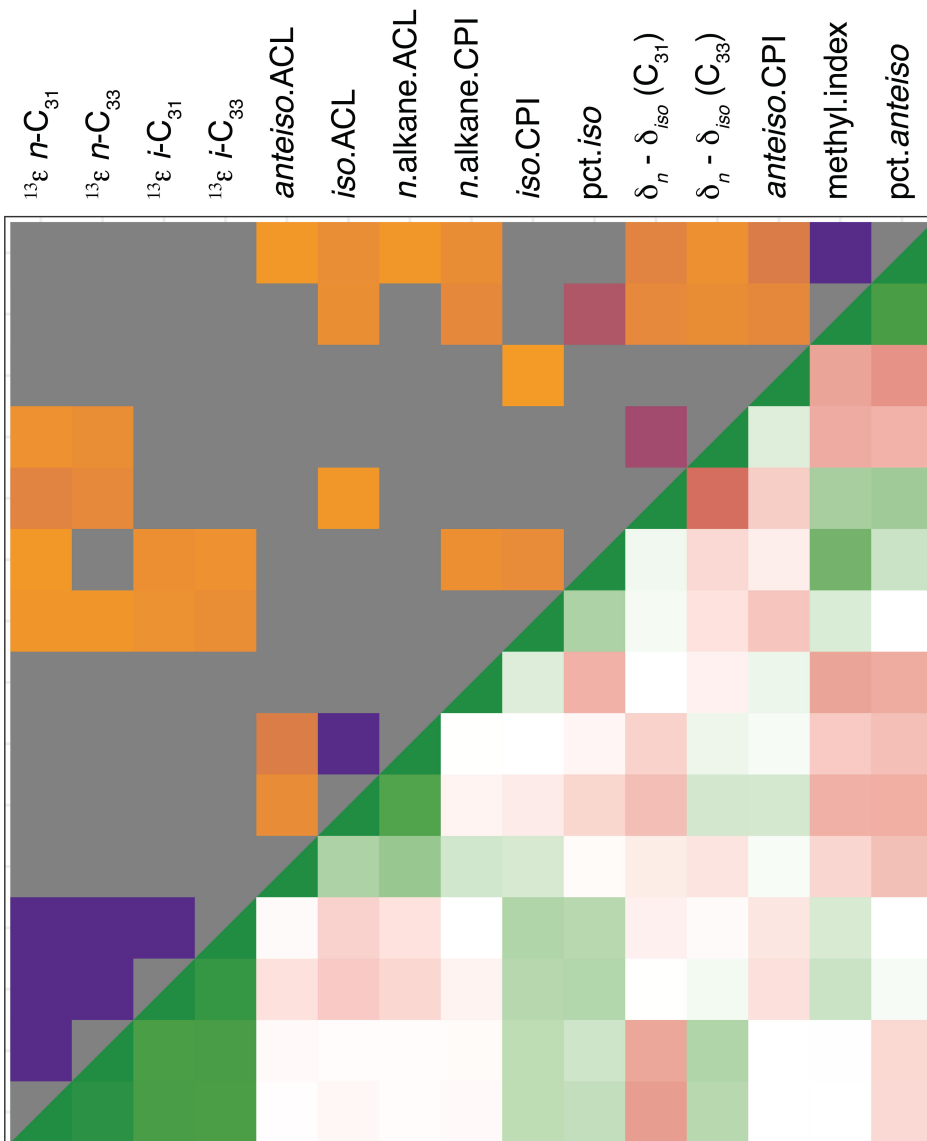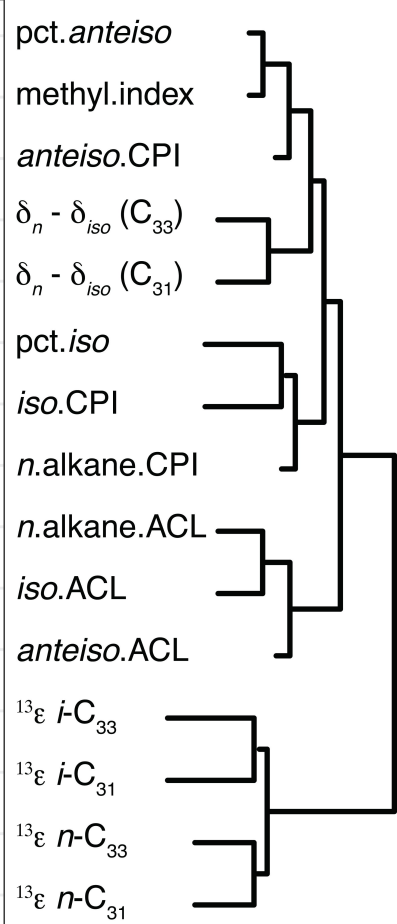

**KEY: Traits**

- WAX
- DEV
- MOR
- MET
- ENZ
- SEED

**p-values  
(BH)**

- $p < 0.05$
- $p \geq 0.05$

**rho values**

- -1
- -0.5
- 0
- 0.5
- 1

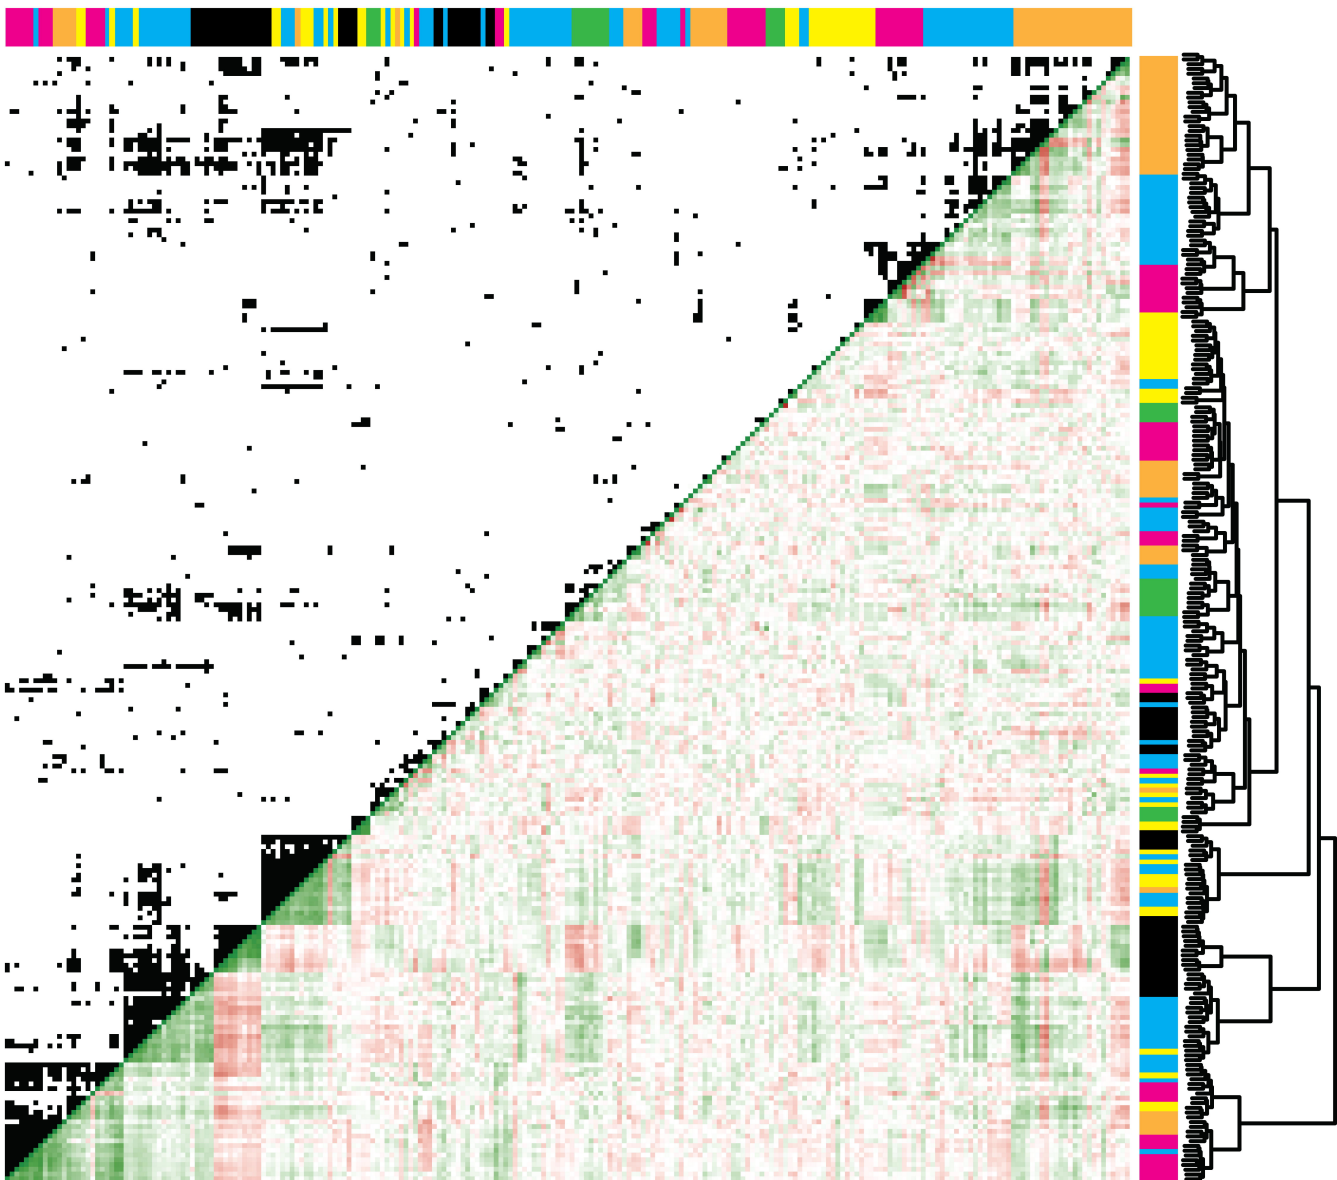

Source: http://www.biorxiv.org/content/10.1101/110718v1.full.pdf
